1 **Primary carbohydrate metabolism genes participate in heat stress memory at the shoot**  
2 **apical meristem of *Arabidopsis thaliana***

3

4 **Justyna Jadwiga Olas<sup>1,\*</sup>, Federico Apelt<sup>2</sup>, Maria Grazia Annunziata<sup>2</sup>, Sarah Isabel Richard<sup>1</sup>,**  
5 **Saurabh Gupta<sup>2</sup>, Friedrich Kragler<sup>2</sup>, Salma Balazadeh<sup>2,#</sup>, Bernd Mueller-Roeber<sup>1,2,\*</sup>**

6

7 **Author affiliations:**

8 <sup>1</sup>University of Potsdam, Institute of Biochemistry and Biology, Karl-Liebknecht-Straße 24-25,  
9 Haus 20, 14476 Potsdam, Germany

10 <sup>2</sup>Max Planck Institute of Molecular Plant Physiology, Am Muehlenberg 1, 14476 Potsdam,  
11 Germany

12 \*Corresponding authors: [olas@uni-potsdam.de](mailto:olas@uni-potsdam.de) (J.J.O.), [bmr@uni-potsdam.de](mailto:bmr@uni-potsdam.de) (B.M.-R.)

13 #Current address: Leiden University, PO Box 9500, 2300 RA, Leiden, The Netherlands

14

15 **Keywords:** Heat stress (HS), heat memory, primary carbohydrate metabolism, priming, shoot  
16 apical meristem (SAM)

## 17 **Abstract**

18 Although we have a good understanding of the development of shoot apical meristems (SAM) in  
19 higher plants, and the function of the stem cells (SCs) embedded in the SAM, there is surprisingly  
20 little known of its molecular responses to abiotic stresses. Here, we show that the SAM of  
21 *Arabidopsis thaliana* senses heat stress (HS) and retains an autonomous molecular memory of a  
22 previous non-lethal HS, allowing the SAM to regain growth after exposure to an otherwise lethal  
23 HS several days later. Using RNA-seq, we identified genes participating in establishing a SAM-  
24 specific HS memory. The genes include *HEAT SHOCK TRANSCRIPTION FACTORS* (*HSFs*), of  
25 which *HSFA2* is essential, but not sufficient, for full HS memory in the SAM, the SC regulators  
26 *CLAVATA1* (*CLV1*) and *CLV3*, and several primary carbohydrate metabolism genes, including  
27 *FRUCTOSE-BISPHOSPHATE ALDOLASE 6* (*FBA6*). We found that expression of *FBA6* during  
28 HS at the SAM complements that of *FBA8* in the same organ. Furthermore, we show that sugar  
29 availability at the SAM is essential for survival at high-temperature HS. Collectively, plants have  
30 evolved a sophisticated protection mechanism to maintain SCs and, hence, their capacity to re-  
31 initiate shoot growth after stress release.

32

## 33 **Introduction**

34 The shoot apical meristem (SAM) is a highly organized tissue that is essential for proper above-  
35 ground growth of plants (1). Descendants of a small number of stem cells (SCs) in the central zone  
36 of the SAM form shoot structures like leaves, flowers and derivatives thereof (seeds and fruits).  
37 The SC population has self-maintaining and self-renewal capacities that allow plants to develop  
38 new organs throughout their entire lifespan (2). SC homeostasis is maintained by a negative  
39 feedback loop involving *CLAVATA1* (*CLV1*), *CLAVATA3* (*CLV3*), and *WUSCHEL* (*WUS*).  
40 *WUS* protein promotes SC identity by inducing expression of the *CLV3* gene, while the *CLV3*  
41 peptide interacts with the receptor-like kinase *CLV1*, thereby suppressing *WUS* expression and  
42 hence SC proliferation (3). Since the growth and initiation of new organs depend on SC activity,  
43 perturbation of the *WUS-CLV* control module affects the plant's architectural organization (1). As  
44 cells of the SAM cannot photosynthesize, due to a lack of functional chloroplasts, they are  
45 heterotrophic and therefore depend on sugar supply from photosynthetically active sources such  
46 as cotyledons and leaves (4). Given its biological importance for seedling survival and shoot

47 growth, the SAM is presumably fortified in particular ways against diverse environmental stresses  
48 the plant may encounter.

49 Although the core regulatory mechanisms that control SAM formation and SCs' functions have  
50 been extensively addressed over the last two decades (2), we have little insights into responses of  
51 the SAM and SCs to environmental stresses and how their formation and function are maintained  
52 under adverse environmental conditions. Recent studies have shown that the *Arabidopsis thaliana*  
53 (*Arabidopsis*) SAM can sense and adaptatively respond to changing soil nitrate levels (5) as well  
54 as to carbon depletion (6). Both observations support the notion that the SAM has the competence  
55 to sense and adapt to environmental stresses to maintain shoot growth.

56 Besides mechanisms enabling acute responses to stress (7, 8), plants have evolved a stress  
57 adaptation system, called stress memory, that 'primes' (or prepares) them to survive a severe stress  
58 that follows a moderate stress which occurred days before. The stress memory supports plants to  
59 store information about the previous stress during a 'memory' phase to better prepare for a  
60 subsequent, potentially more severe (triggering) stress event (9). This information or 'memory' of  
61 the exposure to the priming stress allows plants to survive an otherwise lethal stress occurring days  
62 later (10, 11). The transcriptional memory of a previous stress includes two categories: (i) genes  
63 whose expression is changed by the first stress and show a sustained change of expression during  
64 the memory phase, or (ii) genes that show hyper-induction upon a recurrent (triggering) stress  
65 allowing them to faster and/or strongly respond to a second stress (12). One of the most well-  
66 documented memory phenomena is cold acclimation, which involves coordinated transcriptional,  
67 metabolic, and physiological responses to sub-optimal temperatures that increase the plants'  
68 resistance to subsequent 'colder' temperatures (13, 14). Such a perception mechanism has clear  
69 adaptive value in continually fluctuating natural environments; a cold day is more likely to be  
70 followed by another cold day (or even colder day) than a warm day. Molecular mechanisms  
71 involved in cold stress memory are well understood, and recently some progress has been made in  
72 unraveling transcriptional memory of heat stress (HS) in whole *Arabidopsis* seedlings (9, 11).

73 Similar to cold stress, HS is a major abiotic factor that dramatically limits plant growth,  
74 development, and, consequently, seed production (15). It induces, among others, the expression  
75 of genes encoding (*inter alia*) various types of HEAT SHOCK PROTEINs (HSPs), which confer  
76 thermotolerance by acting as chaperones that facilitate proper protein folding and function (16).  
77 Production of HSPs is induced by HS in all higher organisms and is an energy-costly process

78 controlled by HEAT STRESS TRANSCRIPTION FACTORS (HSFs) (17). In Arabidopsis, there  
79 are 21 known HSFs, grouped into three main classes (A, B, C), based on structural differences  
80 (17). Importantly, not all *HSFs* are HS-inducible. Depending on the stress type, each factor  
81 controls a specific regulatory network. While class A HSFs are positive regulators of the HS  
82 response, members of class B act as repressors (18). HSFs bind to heat shock elements (HSEs,  
83 with a conserved 5'-nGAAnnTTCn-3' sequence) in promoters of HS-inducible genes (17). To  
84 date, only three of the 21 HSFs (HSFA2, HSFA1a, and HSFA1e) have been demonstrated to play  
85 a role in HS memory in Arabidopsis. The *hsfa2* mutant is defective in thermomemory, and HSFA2  
86 protein is required for maintenance of high expression of several HS-memory-related genes, but  
87 not for their initial induction (19, 20).

88 In summary, the SAM and SCs are essential for plants' shoot growth (21), and thermoprimerd  
89 plants can grow after otherwise lethal HS (10, 11), but the mechanisms involved in priming-  
90 induced protection of the SAM are unknown. It is not even known whether the SAM can generate  
91 an HS memory autonomously, and, if so, whether the molecular mechanisms differ from those of  
92 other organs. Also it is conceivable that the SAM generates a non-autonomous HS memory  
93 depending on signals and/or metabolites from sensing cotyledons or young leaves that protect the  
94 SAM from exposure to stress. Here, we show that the SAM, including its SC population, can  
95 generate a strong autonomous HS transcriptional memory with primary carbohydrate metabolism,  
96 protein folding, and meristem maintenance genes acting as HS memory components at the SAM.  
97 We demonstrate that priming promotes meristem maintenance from otherwise lethal HS.  
98 Moreover, we show that sugar availability is a crucial factor for thermomemory. Finally, we  
99 demonstrate that HSFA2 is an important, but not sufficient, transcriptional regulator of  
100 thermomemory in the SAM, suggesting that a distinct and complex regulatory network governs  
101 HS responses in the tissue.

102

## 103 **Results**

### 104 **Thermoprimerd plants fully recover shoot growth after a second heat stress**

105 Since the SAM is responsible for overall shoot growth, we investigated how thermoprimerd affects  
106 plant growth and development under both long-day (16h light/8h dark) and day-neutral (12h  
107 light/12h dark) photoperiods. For this, we subjected five-day-old vegetative seedlings of  
108 Arabidopsis Col-0 plants to an established thermomemory assay (Fig. 1A) (10). Primerd and

109 triggered (PT) plants remained green and continued to grow in both photoperiods (Fig. 1 *B* and *C*),  
110 as previously reported. In contrast, unprimed seedlings subjected solely to the HS trigger (T  
111 seedlings) gradually collapsed and died (Fig. 1*B* and *C*). Analysis of growth behavior, using a 3D  
112 time-lapse imaging system (Fig. 1*D-F* and *SI Appendix*, Fig. S1*A* and *B*) (22, 23), revealed that  
113 the total rosette area of PT plants exponentially increased between days 4 to 16 after priming (DAP;  
114 1-13 days after triggering; DAT). We found the same for control (C) and moderate heat-primed  
115 (P) plants not exposed to a second triggering HS (Fig. 1*D*). This observation confirmed the  
116 importance of priming for the ability of *Arabidopsis* plants to survive a subsequent triggering  
117 stimulus. Importantly, however, non-treated C plants had significantly larger (four-fold,  $P \leq 0.001$ )  
118 rosette areas than PT plants at the end of the imaging period, indicating that the PT treatment  
119 caused an approximately one-week delay in growth (Fig. 1*D*). The relative rosette expansion  
120 growth rate (RER) was significantly reduced in PT plants for several days after the triggering but  
121 started to recover at around 7 DAP (4 DAT) (Fig. 1 *E* and *F*), indicating that their lower rosette  
122 area at the end of the experiment was due to growth inhibition immediately after the triggering and  
123 that growth rate fully recovered a few days later.

124 PT plants may develop a smaller rosette area than C plants because of a reduced leaf initiation rate  
125 (LIR). We tested this possibility by monitoring leaf emergence (Fig. 1*G* and *SI Appendix*, Fig.  
126 S1*C*), which showed that PT treatment reduces LIR. Importantly, however, LIR remained  
127 unabated in P plants. After a short delay following the triggering event it resumed in PT plants but  
128 entirely ceased at ~2 DAT in T plants (see insert in Fig. 1*G*).

129 Since P and PT plants flowered 2 and 5 days, respectively, later than C plants (Fig. 1*H* and *SI*  
130 *Appendix*, Fig. S1*D* and Table S1), we performed toluidine blue staining of longitudinal sections  
131 through meristems, and RNA *in situ* hybridization using floral marker transcript *LEAFY* (24). This  
132 allowed us to determine the exact time of the floral transition of Col-0 plants. As shown in Fig. 1*I*  
133 and *SI Appendix*, Fig. S1*F*, P plants initiated floral transition a day later than C plants. In contrast,  
134 flower formation was delayed by approximately 2 days in PT plants, demonstrating that the SAM  
135 of C, P and PT plants all remained in the vegetative stage during the thermoprimering (i.e., they had  
136 not induced flowering). Hence, the transcriptome changes induced by priming (see following  
137 chapter) are not caused by a shift in development phase between C and P or PT plants. In summary,  
138 P plants survived when the triggering stimulus was applied, with only a temporary reduction of  
139 shoot growth. In contrast, in unprimed plants the triggering stress damaged the existing leaves,

140 blocked the formation of new leaves at the SAM, and limited further shoot development. Thus, the  
141 priming treatment induces mechanisms that protect the SAM from the growth-terminating damage  
142 observed in T plants.

143

#### 144 **Identification of HS memory genes in the SAM**

145 Given that transcriptome changes in the SAM are not induced by developmental transitions (see  
146 above), and that the SAM and SCs have a crucial role in shoot regrowth after a priming HS, we  
147 investigated how the SAM responds to changes in HS treatments by performing RNA-sequencing  
148 (RNA-seq). To this end, we manually dissected and analyzed the transcriptome of shoot apices  
149 containing young leaf primordia from P plants and non-treated C plants at selected time points  
150 after moderate heat priming (4, 8, 24, 48 and 78h into the recovery/memory phase), and at 6 and  
151 24h after a second exposure to the triggering HS from C, P, PT, and T plants (Fig. 1A and *SI*  
152 *Appendix*, Fig. 2 and Data S1). Principal Component Analysis (PCA) of the transcriptome data  
153 clustered the shoot apex samples into three separate groups (Fig. 2A and *SI Appendix*, Fig. 2). As  
154 expected, one group included all samples of C apices (C4, C8, C24, C48, C78, and C96, *i.e.*, apices  
155 of untreated C plants collected 4, 8, 24, 48, 78, and 96h after priming). Interestingly, this cluster  
156 also included the P apices harvested 24, 48, and 78h after priming (P24, P48, and P78 samples)  
157 and PT apices exposed to both stimuli harvested 96h after priming and, thus, 24h after triggering  
158 (PT96 samples) were assigned to the same group (Fig. 2A). The clustering of P24, P48, P78, and  
159 PT96 together with C samples suggests that gene expression patterns in the SAM of P and PT  
160 plants are rapidly reset (within 24h) for most genes to control-like patterns after priming and  
161 triggering treatments; thus, the resetting is faster in the shoot apex than in whole seedlings  
162 following an identical treatment, where resetting reportedly takes longer than 24h (25). The two  
163 other groups included the P4 and P8 primed samples, and triggered-like (PT78, T78, and T96)  
164 samples. As expected, after the exposure to heat priming, hundreds of genes were significantly  
165 differentially expressed (DE) between apices of P and C plants (Fig. 2B; Table S2): 1,175 genes  
166 at 4h, 780 genes at 8h, and 203 genes at 48h. At 78h, no significant differences in gene expression  
167 between shoot apex samples of P and C plants were observed. Thus, the shoot apex of Col-0 plants  
168 very rapidly senses temperature changes but also resets relatively fast after priming to control  
169 levels.

170 Interestingly, we observed a faster transcriptional response of the shoot apex after triggering in PT  
171 plants compared to plants subjected to only the triggering stress. For example, 24h after triggering,  
172 expression of only a single gene significantly differed between PT and C samples (Fig. 2B; Table  
173 S2). Thus, priming enables gene expression to return to control levels within 24 h of triggering,  
174 while expression of many genes stays high in unprimed and triggered seedlings. For example, 6-  
175 24h after triggering 1,500 - 2,000 genes were significantly DE in T plants, relative to controls, and  
176 T plants subsequently died (Fig. 2B; Table S2).

177 We were particularly interested in identifying transcriptional HS memory genes, which, according  
178 to the literature (12), are genes showing hyper- or hypo-responsiveness when exposed to the  
179 second, more severe stress (memory genes, as defined in *SI Appendix*, Fig. S3A). In earlier studies,  
180 genes with sustained up- or down-regulation in whole seedlings during the memory phase, without  
181 being necessarily DE after a triggering HS, were regarded as thermomemory-associated genes (10,  
182 11). As *Arabidopsis* does not survive a triggering HS without a priming HS, we were particularly  
183 interested in DE genes responding to the triggering treatment after a previous priming treatment.  
184 We considered such genes as of particular importance for enhancing HS tolerance and the  
185 establishment of HS memory.

186 As outlined in *SI Appendix* Fig. S3A, shoot apex transcriptional HS memory genes were defined  
187 as genes that were expressed significantly higher or lower in apices of primed plants 4 and 8h after  
188 the priming than in C plants, and higher/lower 6h after the triggering (78h after priming). In total,  
189 we identified 394 transcriptional HS memory genes in the shoot apex, of which 217 were  
190 upregulated, and 177 were downregulated (Table S2, *SI Appendix*, Fig. S3B). Furthermore, to  
191 identify high-confidence shoot apex memory genes, we introduced a second criterion, i.e., a fold  
192 change in gene expression of  $|\log_2FC| > 1$ . In total, 149 upregulated and 33 downregulated genes,  
193 i.e., 182 genes, met both criteria (Fig. 2C-E; Data S2). Genes induced or downregulated by the  
194 priming HS, but not again by the triggering HS after the three-day recovery period, were not  
195 regarded as memory genes but recognized as primary stress-responsive genes (11). As expected,  
196 several *HSP* family members were among the 149 transcriptional HS memory genes upregulated  
197 by the priming and triggering HS treatments in the shoot apex. These include cytosolic *HSP17.6A*,  
198 nuclear-encoded mitochondrial *HSP22* and chloroplast *HSP21*, as well as five other small *HSPs*  
199 (Fig. 3A, *SI Appendix*, Fig. S4A), suggesting that HS-protective mechanisms are active in all  
200 cellular compartments of the SAM. As previous HS studies did not analyze the responses in

201 meristematic tissues, we confirmed the RNA-seq data by RNA *in situ* hybridization using *HSP*-  
202 specific (*HSP17.6A*, *HSP21*, and *HSP22*) probes, and by quantitative reverse transcription –  
203 polymerase chain reaction (qRT-PCR; Fig. 3B and C and *SI Appendix*, Fig. S4). We found that  
204 expression of the *HSPs* was rapidly induced in all SAM domains, within minutes of a moderate  
205 priming HS, then gradually declined until 8h, whereas at 24h after priming *HSP22* was the only  
206 detectable *HSP* transcript in the SAM. Moreover, in PT plants we observed hyper-induction of  
207 *HSP* genes in the SAM after HS triggering compared to P plants, supporting the RNA-seq results  
208 (Fig. 3). These findings demonstrate that *HSP17.6A*, *HSP22*, and *HSP21* are *bona fide* memory  
209 genes acting in the SAM. Importantly, we also identified primary carbohydrate metabolism genes  
210 involved in sugar metabolism (particularly glycolysis), including *FRUCTOSE BISPHOSPHATE*  
211 *ALDOLASE 6 (FBA6)*, *PYRUVATE KINASE 4 (PKP4)*, and *UDP-GLUCOSE*  
212 *PYROPHOSPHORYLASE 2 (UGP2)* (Fig. 3A and *SI Appendix*, Fig. S4; Data S2), strongly  
213 indicating that carbohydrate conversion is essential for the HS memory of the SAM. To obtain  
214 information on expression patterns at higher spatial resolution, we selected *FBA6* as a probe for  
215 RNA *in situ* hybridization. *FBA6* transcript was barely or not detectable in the SAM of non-  
216 stressed plants. However, its transcript abundance increased at 2 and 4h after priming, leading to  
217 expression in the organizing center and central, peripheral and rib zones of the SAM (Fig. 3B).  
218 This result demonstrates differences in the temporal dynamics between the HS memory genes  
219 responding at the SAM; for comparison, transcripts of *HSP* memory genes were already induced  
220 at 0.5h after the priming. Moreover, expression of *FBA6* at the SAM was even more strongly and  
221 faster (already within 0.5h) induced after the triggering HS compared to the priming stimulus. We  
222 confirmed the transcriptional induction of *FBA6* and other primary carbohydrate metabolism genes  
223 in the SAM of PT plants relative to controls (C plants) by qRT-PCR (Fig. 3C and *SI Appendix*,  
224 Fig. S4). Thus, *FBA6* is a *bona fide* SAM memory gene in vegetatively growing plants.  
225 Importantly, none of the primary carbohydrate metabolism genes were previously reported to be  
226 components of the HS memory machinery.

227 Furthermore, among the significantly downregulated memory genes was the SAM-specific  
228 leucine-rich repeat receptor-like kinase *CLAVATA1 (CLV1)* (Fig. 3A, *SI Appendix*, Fig. S3B; Table  
229 S2). RNA *in situ* hybridization and qRT-PCR analyses confirmed that expression of *CLV1* was  
230 downregulated in the SAM of P plants relative to controls immediately after priming (Fig. 3B and  
231 C). Notably, *CLV1* transcription was even more downregulated in the SAM of PT plants, revealing



232 a clear memory pattern. Furthermore, expression of *CLV3*, which encodes the CLV1-binding  
233 peptide ligand, followed the same type of expression pattern (Fig. 3B and C). This observation  
234 suggests that the SCs directly sense the HS treatments, as genes specifically expressed in the SC  
235 responded to the thermoprimering.

236 Taken together, our data suggest that key genes of primary carbohydrate metabolism and  
237 responsible for meristem maintenance, as well as genes involved in protein folding and repair, are  
238 important for thermomemory in Arabidopsis. Importantly, lack of recovery of *CLV1* and *CLV3*  
239 expression in the SAM of triggered, unprimed plants shows that priming protects the SAM from  
240 the negative, growth-ceasing impact of an otherwise lethal HS. Hence, we demonstrated that the  
241 SAM of T plants is hypersensitive to HS, leading to lethality shortly after triggering.

242 Next, we searched for commonalities in gene responses between the shoot apex and two previously  
243 reported studies of whole seedlings at a time point available for all three datasets (4h after priming,  
244 obtained in identical priming setups; *SI Appendix*, Fig. S5) (10, 11). First, we searched for genes  
245 up- or downregulated at 4h after priming compared to control by applying the same conservative  
246 cutoff to all three datasets ( $|\log_2FC| > 2$ ). In this way, 2,521 genes were DE in at least one of the  
247 three datasets. Importantly, at 4h after priming the shoot apex shared only 119 (of 364) and 295  
248 (of 1,316) DE genes with whole seedlings (10, 11). The intersection of all three datasets at that  
249 time point included only a small number of 100 genes. Thus, the majority of the transcripts altered  
250 only in the shoot apex (1,045 of 1,359 genes), including *FBA6*, are most likely involved in  
251 generating the shoot apex HS memory. We next established a heatmap to present the expression  
252 levels of the 2,521 genes regulated at 4h after priming considering time points common to all three  
253 datasets, i.e., early (4h) and late (48h/52h) after priming. Importantly, many of the genes up- or  
254 downregulated in the shoot apex were not, or - if at all - only marginally, affected in whole  
255 seedlings (*SI Appendix*, Fig. 5SB). These clear differences in gene expression during  
256 thermoprimering suggest a tissue-dependent control (the SAM vs. leaves) in the regulation of HS  
257 memory in plants (*SI Appendix*, Fig. S5; Data S2).

258

### 259 ***FBA6* acts as a thermomemory factor in the SAM**

260 Our analysis (Fig. 3; *SI Appendix*, Fig. S5) had revealed that *FBA6* is likely involved in generating  
261 HS memory in the shoot apex which contains meristematic tissue. We, therefore, tested whether  
262 *FBA6* is a SAM-specific HS memory gene of Col-0 plants during vegetative growth. Tissue-

263 specific localization of *FBA6* expression at 2h after priming revealed that *FBA6* transcript  
264 abundance was, in addition to the SAM and young leaf primordia, also elevated in root apical  
265 meristems and root primordia, but not in cotyledons, the hypocotyl, or the main root (Fig. 4A).  
266 This result suggested that *FBA6* is specifically generating a HS memory in meristematic, but not  
267 other, tissues. Analysis by qRT-PCR confirmed that *FBA6* expression was predominantly induced  
268 by heat at the SAM and the root apex (Fig. 4B). This demonstrates that HS memory in the non-  
269 photosynthetic meristems differs from that in cotyledons. Furthermore, as *FBA6* transcript was  
270 detectable at the SAM only after HS we investigated the exact timing of *FBA6* transcriptional  
271 activation. RNA *in situ* hybridization revealed that *FBA6* transcript was induced at the SAM  
272 approximately 1h after the priming treatment (Fig. 4C), and therefore clearly later than the HSP  
273 transcripts in the same organ (see Fig. 3).

274 The Arabidopsis genome encodes eight aldolases (*FBA1-8*). While *FBA1* to 3 enzymes are plastid-  
275 localized and active in photosynthetic cells, *FBA4* to 8 are located in the cytosol and involved in  
276 gluconeogenesis and glycolytic carbohydrate degradation (26). Analysis of the shoot apex RNA-  
277 seq data (Fig. 4D) revealed that only the expression of *FBA6* significantly changed during the  
278 priming treatment. Moreover, *FBA6* expression was hyper-induced after HS triggering, suggesting  
279 that only *FBA6* is involved in generating the SAM's HS memory. Furthermore, RNA *in situ*  
280 hybridization revealed that only *FBA1*, 2, 3 and 8 are constitutively operative at the SAM of  
281 control/non-treated plants with *FBA8* showing the highest expression (Fig. 4E), suggesting that  
282 *FBA8* is the major aldolase isoform active at the SAM. We, therefore, analysed expression of  
283 *FBA8* during thermoprimering (Fig. 4F) and found a transient downregulation of *FBA8* transcript  
284 abundance at the SAM after priming and triggering treatments. Importantly, the downregulation  
285 of *FBA8* at the SAM following HS was countered by an induction of *FBA6* (Fig. 4F),  
286 demonstrating that *FBA8* and *FBA6* are oppositely regulated in an HS-dependent manner in this  
287 organ. We also found that suppression of *FBA8* by HS was considerably more pronounced in the  
288 SAM and the root apex than in whole seedlings and cotyledons (Fig. 4G), supporting our finding  
289 that HS memory at the SAM is achieved differently than memory in other organs.

290 We next subjected *fba6* and *fba8* knockout, and Col-0 wild-type seedlings to the thermomemory  
291 treatment (Fig. 4H). While growth was similar in *fba6* and Col-0 plants during and after priming,  
292 growth of *fba8* mutant seedlings was reduced compared to wild-type after priming (*SI Appendix*,  
293 Fig. S6A and B). Both, *fba6* and *fba8* mutants were more sensitive to HS than wild type when

294 subjected to a triggering HS. After priming and triggering, both mutants showed weaker recovery  
295 than PT Col-0 seedlings, and a reduced fresh weight (Fig. 4H, *SI Appendix*, Fig. S6A and B),  
296 demonstrating that aldolases of primary carbohydrate metabolism are essential components of  
297 SAM thermomemory. Lastly, the important role of FBA6 for thermomemory in the SAM was  
298 corroborated by the transcriptional response of downstream memory factor *HSP22* (*SI Appendix*,  
299 Fig. S6C). We found that *HSP22* transcript level was strongly compromised at the SAM of the  
300 *fba6* mutant compared to Col-0 plants, demonstrating that HS memory at the SAM strongly  
301 depends on primary carbohydrate metabolism genes.

302 In summary, the combined observations provide evidence that primary carbohydrate metabolism  
303 plays a crucial role in maintaining HS memory in the Arabidopsis SAM.

304

### 305 **Sugar availability at the SAM is essential for HS memory**

306 The finding that primary carbohydrate metabolism genes including *FBA6* are strongly induced in  
307 the photosynthetically inactive SAM, which is photosynthetically inactive, after HS treatment, and  
308 the fact that FBAs are key glycolytic enzymes participating in the breakdown of starch or sucrose  
309 to generate carbon skeletons and ATP for anabolic processes (27), prompted us to test whether  
310 carbohydrate metabolism is altered during HS. First, we generated a heat map to display  
311 differences in the expression level of carbohydrate metabolism genes of plants subjected to  
312 priming and triggering treatments (Fig. 5A). Notable differences were observed between C, P, PT  
313 and T plants. In particular, genes involved in plastidial glycolysis, and starch and sucrose  
314 metabolism were upregulated after the triggering HS, suggesting that carbohydrate metabolism  
315 plays an essential role for survival during temperature stress. To better understand the metabolic  
316 differences between the different treatments we subjected C, P, PT and T treated plants to iodine  
317 staining to assess their starch content (and hence overall carbohydrate status) after priming and  
318 triggering. We found that immediately after priming, starch content declined in primed Col-0  
319 plants compared to control plants (*SI Appendix*, Fig. S7). Interestingly, three days after the priming  
320 plants had a higher starch content indicating that more starch accumulated in P plants during the  
321 memory phase than in C plants. After triggering, starch content was high in Col-0 PT plants, but  
322 low in Col-0 plants subjected to only the triggering HS (T plants).

323 To further investigate the involvement of sugars in thermomemory, we measured levels of soluble  
324 sugars and starch after priming and triggering in Col-0 seedlings (Fig. 5B). Confirming the results

325 of the iodine staining and supporting the model that sugars are important for establishing  
326 thermomemory, we observed a transient decrease of starch and soluble sugar levels in P seedlings  
327 directly after priming, compared to controls, suggesting that carbon consumption is increased in  
328 Col-0 plants after the priming HS. Notably, the metabolite levels in P seedlings recovered after  
329 three days (72h and 78h after priming) and exceeded significantly those of C seedlings.  
330 Furthermore, the levels of those metabolites were even higher in PT than control plants 0.5 and 6h  
331 after triggering, demonstrating that carbohydrate metabolism in seedlings responded differently to  
332 the second HS than to the first priming HS. Moreover, increased sugar and starch levels were only  
333 observed in PT plants, while the levels of these metabolites strongly declined in T plants, similar  
334 to P plants subjected to HS priming. These results clearly demonstrate that thermoprimering triggers  
335 complex changes in starch and sugar metabolism and induces metabolic adjustments in those  
336 plants.

337 To test if establishing thermomemory, and growth recovery after HS, requires energy, we grew  
338 Col-0 seedlings on Murashige-Skoog (MS) medium supplemented with (Fig. 5C) or without (Fig.  
339 5D) 1% sucrose as a carbon source. Additionally, we grew another set of seedlings of which  
340 cotyledons were removed before the priming treatment (Fig. 5E and F). With or without sucrose  
341 in the medium, PT seedlings with cotyledons survived thermoprimering and grew further when  
342 cultured (Fig. 5C and D). Seedlings with removed cotyledons also initiated new leaves after  
343 priming, irrespective of the presence or absence of sucrose in the medium (Fig. 5G and H).  
344 However, sucrose was required for seedlings lacking cotyledons to initiate the formation of new  
345 leaves and increase leaf size after the triggering HS (Fig. 5G and H). This observation  
346 demonstrates that plants require carbon to establish thermomemory and restart growth after the  
347 triggering HS.

348 Next, to investigate if the generation of HS memory at the SAM depends on carbon, we analysed  
349 the SAM-specific expression of HS memory gene *HSP22* at 0.5h after priming in P plants grown  
350 with or without cotyledons on media supplemented with sucrose, glucose, or mannitol. As shown  
351 in Figure 5I, expression of *HSP22* was enhanced in plants grown with cotyledons and sucrose in  
352 the medium. Notably, *HSP22* expression was much lower in plants grown on glucose, and  
353 undetectable in plants grown on mannitol, suggesting that HS memory at the SAM is mainly  
354 triggered by sucrose. This conclusion is supported by the observation that supply of external

355 sucrose rescues the HS memory in plants lacking cotyledons (Fig. 5J). Thus, our results clearly  
356 demonstrate that establishing thermomemory in the SAM is a sugar-dependent process.

357

### 358 **HSFA2 is required, but not sufficient, for full HS transcriptional memory in the SAM**

359 Transcription factor HSFA2 is reportedly not involved in the transcriptional activation of HS  
360 memory genes in seedlings; rather, it functions in maintaining their enhanced expression after a  
361 priming HS (20). To determine whether HSFA2 or other HSFs contribute to the establishment of  
362 thermomemory in the SAM, we analyzed the 1-kb 5'-upstream regulatory regions of heat memory  
363 genes for basic, and perfect, *cis*-regulatory HSE elements; those might be binding targets of HSFs  
364 (28) (Table S3).

365 We detected basic and perfect HSEs, respectively, in the promoters of 78 and ten high-confidence  
366 HS memory genes of the SAM (42.8% and 5.5% of the 182 genes, respectively). This is a highly  
367 significant enrichment compared to all Arabidopsis genes ( $P \leq 0.001$ , hypergeometric test; for  
368 details see Methods), suggesting that these genes are direct targets of SAM HSFs (Table S3 and  
369 S4).

370 Currently, knowledge of the mechanisms underlying binding preferences of HSFs for specific  
371 HSEs is missing; we also do not know how many, and which, of the 21 HSFs in Arabidopsis  
372 control thermomemory in different tissues (29). However, our RNA-seq data revealed that eight  
373 HSFs (*HSFA1e*, *HSFA2*, *HSFA3*, *HSFA7a*, *HSFA7b*, *HSFB1*, *HSFB2a*, and *HSFB2b*) might be  
374 involved in transcriptional memory in response to thermoprimering (Fig. 6A and B, *SI Appendix*,  
375 Fig. S8A and B), which was confirmed by RNA *in situ* hybridization (*SI Appendix*, Fig. S8C).

376 Next, we investigated whether expression of memory genes in the SAM requires HSFA2. First,  
377 we confirmed transcriptional memory of *HSFA2* expression in the SAM of Col-0 seedlings by  
378 qRT-PCR and RNA *in situ* hybridization (Fig. 6C and D). We then performed RNA *in situ*  
379 hybridization on *hsfa2* knockout mutants, using probes for various memory genes, including genes  
380 involved in protein folding (*HSP17.6A*, *HSP21*, and *HSP22*) and primary carbohydrate  
381 metabolism (*FBA6*). Expression of these *HSPs* was much weaker in *hsfa2* than in Col-0 wild-type  
382 SAMs and, more importantly, there was no detectable induction of the carbohydrate metabolism  
383 genes (Fig. 6E and F; *SI Appendix* Fig. S9).

384 These findings demonstrate that in the SAM HSFA2 is required for an initial transcriptional  
385 activation of memory genes. This is in stark contrast to previous reports on whole seedlings, which

386 showed that *HSFA2* is not involved in the initial transcriptional activation of target genes after  
387 priming and required only for maintaining their elevated expression (19, 20). Furthermore,  
388 expression of several *HSPs* in the SAM 0.5 h after the priming was weaker than in controls, but  
389 not absent in *hsfa2* mutant seedlings, suggesting that *HSFA2* is required but is not sufficient for  
390 full transcriptional memory in this organ (Fig. 6E). This observation is consistent with our finding  
391 that seven other *HSFs* apart from *HSFA2* are induced in the SAM during the thermomemory phase.  
392

## 393 **Discussion**

394 In *Arabidopsis* seedlings, a severe (triggering) HS is lethal, while a moderate HS protects from an  
395 otherwise lethal triggering HS applied several days later (10, 11). Despite the high academic and  
396 commercial interest in understanding how plants survive exposure to high temperature, the  
397 molecular mechanisms underlying this phenomenon are not well understood. Although the new  
398 above-ground organs formed by plants are initiated by the SAM (30), stress responses of the SAM  
399 have rarely been investigated in the past, including those involving thermomemory. To our  
400 knowledge, information on responses of the SAM to HS, or its HS memory, is lacking. Most  
401 previous studies on HS memory have focused on whole seedlings and their responses to the first  
402 moderate priming treatment and the directly following memory phase, neglecting molecular and  
403 biochemical responses induced by the second lethal triggering treatment. This observation strongly  
404 limits our overall understanding of plants' responses to recurrent thermostress in their natural  
405 habitats.

406 Our results provide two lines of compelling evidence that the SAM of *Arabidopsis* directly  
407 responds to high-temperature stress. First, leaf initiation (the main developmental read-out of the  
408 vegetative SAM) was completely inhibited in T plants, but continued unabated in P plants, and  
409 was only delayed in PT plants, demonstrating the importance of priming for the protection of the  
410 SAM. Thermoprime plants grew further after the severe HS triggering, generating new leaves  
411 and initiating floral transition, although growth and development were delayed. The inhibitory  
412 effect of HS (above 30°C) on growth has been previously reported (31), but the effects of a  
413 moderate priming HS on development have not been systematically addressed. We demonstrate  
414 here that even a moderate priming HS decreases growth and interferes with development.  
415 Moderate priming and severe triggering HS affect growth and development in a manner different  
416 from the effect of elevated ambient temperature, which promotes growth and induces earlier

417 flowering in Arabidopsis (32). This observation suggests that delays in growth and transition to  
418 flowering in PT plants are adaptive responses that reduce risks of flowering and seed formation  
419 during an excessively warm period, and thus potential losses of yield.

420 Second, we established that the SAM has a distinct thermoprimering capacity and transcriptional  
421 thermomemory and show that this is a carbon-dependent process. We identified many  
422 thermomemory genes whose expression increased or decreased in the SAM after exposure to a  
423 moderate, priming HS, with a further up- or downregulation upon exposure to a second severe  
424 triggering stimulus. The SAM memory genes included several cytosolic, mitochondrial, and  
425 plastidial *HSPs* suggesting that HS-protective mechanisms are active in all cellular compartments  
426 of the SAM (10, 11). An unexpected finding of our study, supported by experimental evidence, is  
427 that primary carbohydrate metabolism plays a key role in establishing thermomemory in the SAM.  
428 First, our analyses identified several primary carbohydrate metabolism genes, including *FBA6*, as  
429 *bona fide* thermomemory genes. Among all eight aldolases in Arabidopsis, only *FBA6* showed a  
430 hyper-induction in response to HS treatment at the SAM; the transcriptional response of *FBA6* to  
431 thermoprimering is specific to meristematic tissues including the SAM. Redundancy of genes  
432 encoding primary carbohydrate metabolism enzymes is well documented in plants. The different  
433 isoforms may provide metabolic robustness, or flexible responses to environmental cues, as seen  
434 here for HS memory. Reduced expression of *FBA8* during HS at the SAM was balanced by  
435 upregulation of *FBA6* expression in the same organ, indicating that both *FBA*s replace each other's  
436 function during the fluctuating conditions, a behaviour similar to that observed for *NITRATE*  
437 *REDUCTASE 1* and *2* which complement their expression in the SAM (33). Moreover,  
438 cytoplasmic aldolases like *FBA6* and *FBA8* are essential for gluconeogenesis and glycolysis to  
439 generate ATP and building blocks for anabolism (27), thereby allowing the cytosolic glycolytic  
440 network to provide metabolic flexibility that facilitates acclimation of plants to environmental  
441 stresses. Changes in the expression of aldolases seem to be essential for plants during  
442 thermoprimering, as seen previously for animals, where FBA activity was required for the growth  
443 and survival of chronically infected mice (34).

444 Furthermore, higher plants use sucrose and starch as the principal substrates for glycolysis (27),  
445 and our metabolite analysis showed that thermoprimering strongly affects carbon reserves in  
446 thermoprimered plants. Interestingly, we also noted increased expression of *SUCROSE SYNTHASE*  
447 *3 (SUS3)* and *UGP2*, suggesting that sucrose breakdown occurs at that time in the SAM. *SUS-*

448 encoded enzymes catalyse sucrose degradation and play an important role in carbon use in non-  
449 photosynthetic cells (35, 36). Moreover, primary carbohydrate metabolism genes such as those  
450 identified here as HS memory genes in the SAM are well-established entry points for many key  
451 metabolic processes such as glycolysis, a central metabolic pathway for energy production. Our  
452 data thus suggest that carbohydrates play a crucial role in thermoprimering in the SAM. Sugars are  
453 also essential regulators of many developmental and biological processes and important carbon  
454 sources for energy metabolism, particularly in heterotrophic organs like the SAM in which no  
455 functional chloroplasts exist and which are, therefore, incapable of photosynthesis (4).  
456 Intriguingly, sugar (glucose) metabolism and the associated provision of energy also play  
457 important roles during stress responses in human and animal SCs (37, 38), suggesting a conserved  
458 mode of action of SCs in both photosynthetic and non-photosynthetic organisms. We showed that  
459 SCs can directly respond to high temperature, as the meristem maintenance genes *CLV1* and *CLV3*  
460 act as HS memory components. Moreover, we demonstrated that priming maintains SC activity  
461 and protects the SAM from growth-terminating damage, which otherwise occurs in plants exposed  
462 to acute stress.

463 Next, we demonstrated a clear requirement of sucrose for the establishment of thermomemory in  
464 the SAM. The removal of cotyledons before priming impaired thermotolerance of the SAM, which  
465 could be restored by an exogenous supply of sucrose. In the presence of sucrose, PT Col-0  
466 seedlings with removed cotyledons grew normal after thermoprimering, while the formation of new  
467 leaves was significantly reduced in seedlings grown without sucrose and cotyledons. Our  
468 observations strongly indicate that cotyledons play an important role for thermomemory by  
469 providing sugars to the SAM, harboring the SC population, of stressed plants. Cotyledons are the  
470 main photosynthetic sources of fixed carbon in seedlings that provide the energy needed for growth  
471 until the first true leaves emerge (39). Lack of cotyledons and sucrose in the medium during  
472 thermoprimering leads to growth inhibition due to carbon limitation. This observation is in  
473 accordance with the weaker expression of the *HSP22* memory gene at the SAM of plants grown  
474 without cotyledons but with sucrose, compared to plants grown with both cotyledons and sucrose.  
475 The expression differences likely reflect the importance of a clearly defined source-sink  
476 relationship between cotyledons (or leaves) and the SAM. In this scenario, sucrose would be more  
477 efficiently transported from cotyledons to the SAM than from roots exposed to sucrose in the  
478 medium. Cotyledons not only supply phloem-mobile metabolites, but also systemic signals



479 required for full functionality of the SAM. Together, our results strongly suggest that  
480 transcriptional induction of *HSP* genes in the SAM requires cellular energy provided by carbon  
481 metabolic activity.

482 An important and most relevant finding of our work is that the SAM, and the SC population it  
483 harbors, recruits a HS response (and memory) network that in many aspects differs from that of  
484 whole seedlings mainly harboring differentiated cells. Our results clearly demonstrate that a tissue-  
485 or organ-specific heat-memory exists in Arabidopsis. Firstly, and importantly, the timing of the  
486 expression of several *HSP* memory genes differed between the SAM and whole seedlings. While  
487 memory genes in the apex are induced within minutes and remain induced for up to 8h, induction  
488 of such genes in whole seedlings occurs after 4-24h, and remains elevated for up to 52h (20),  
489 clearly indicating that HS responses are more rapid in the SAM than in most other tissues. We  
490 found that *HSFA2*, which was previously reported to be only required for the *maintenance* of  
491 thermomemory in whole seedlings (19, 20), is necessary for the *activation* of memory genes at the  
492 SAM. *HSFA2* transcript level peaks within 30 min of priming and rapidly declines thereafter,  
493 whereas its expression in whole seedlings is reportedly strongest 4h after priming (20).  
494 Furthermore, the SAM of the *hsfa2* mutant has largely lost transcriptional memory. As a  
495 consequence, the expression of *HSP* memory genes is strongly downregulated shortly after  
496 priming in the *hsfa2* SAM. Thus, within the SAM, *HSFA2* is not only responsible for the  
497 maintenance of *HSP* expression, which is in contrast to whole seedlings, but also for their initial  
498 transcriptional induction. The probable physiological importance of such organ-specific  
499 differences in timing and regulation warrants attention in future research. In addition, we showed  
500 that different sets of genes, including *FBA6*, are involved in generating HS memory in the SAM  
501 and cotyledons. To date, only three of the 21 HSFs in Arabidopsis had been shown to participate  
502 in HS memory: *HSFA1a*, *HSFA2*, and *HSFA1e* (19, 20, 29, 40). Here, we provide molecular  
503 evidence that eight HSFs are likely involved in thermomemory in the SAM.

504 Interestingly, although multiple *HSFA1* isoforms (a, b, d, and e) are reportedly master regulators  
505 of the HS response in Arabidopsis and required for expression of *HSFA2* (41), we only found  
506 *HSFA1e* to be transcriptionally induced in the SAM, suggesting that induction of *HSFA2* in the  
507 SAM might be only *HSFA1e*-dependent. Moreover, the glucose-dependent regulation of  
508 thermomemory in whole seedlings acts through the *HSFA1a* isoform (40) whose expression was  
509 not affected by priming, or by priming and triggering, stresses in the SAM. This observation

510 provides additional evidence that the mechanisms of thermomemory regulation in the SAM and  
511 other organs of seedlings differ.

512 Our data highlight the complexity of the HS transcriptional memory in the SAM, which depends  
513 on carbon metabolism involving (*inter alia*) *FBA6*, and HSF pathways involving HSFA2 as an  
514 important, but not the only, transcriptional regulator (Fig. 7). The ability of the SAM, which  
515 harbors the key SC population, to respond to environmental stresses and retain ‘memory’ of  
516 previous non-lethal stress has clear eco-physiological value. The unique renewal capacity of SCs  
517 provides plants with the developmental flexibility required to adjust their developmental processes  
518 in response to environmental cues, and to replace body parts lost through damage caused by  
519 stresses. This plasticity is particularly crucial for young plants that have not yet initiated axillary  
520 meristems or floral transition as their survival depends on a functional SAM and the embedded  
521 SCs forming new leaves and flowers.

522

## 523 **Material and methods**

524 Detail description of the material and methods used in this study is described in the supplementary  
525 *Appendix*.

526

527 **Data availability.** The sequencing data sets are available at the NCBI Sequencing Read Archive  
528 (SRA), BioProject ID PRJNA505602.

529

## 530 **Acknowledgments**

531 Bernd Mueller-Roeber thanks the Deutsche Forschungsgemeinschaft, Germany (DFG), for  
532 funding project A5 within the Collaborative Research Centre 973 ‘Priming and Memory of  
533 Organismic Responses to Stress’ ([www.sfb973.de](http://www.sfb973.de)). Fritz Kragler thanks the European Research  
534 Council (ERC) for funding project Syg Project 810131 (PLAMORF). We thank Eike Kamann  
535 from the University of Potsdam (Germany) for cloning work and technical assistance, and Svenja  
536 Reeck from the same university for general lab work. We thank Prof. Dr. Dr. h.c. Mark Stitt from  
537 the Max Planck Institute of Molecular Plant Physiology, Potsdam, Germany, for constructive  
538 comments on the research, and Dr. Lei Yang from the same institute for assisting with taking plate  
539 images.

540

541 **Author contributions**

542 The research and funding is based on founding observations made by S.B. and B.M.-R. J.J.O. and  
543 B.M.-R. conceived the details of the study and designed the experiments involving suggestions  
544 made by F.K. J.J.O. carried out the experiments and analyzed the data. F.A. performed growth  
545 measurements and analyzed the RNA-seq data, except for generating the cluster heat map (S.G.).  
546 M.G.A. measured and analyzed the metabolite data. S.I.R. assisted in performing experiments.  
547 J.J.O. and B.M.-R. wrote the manuscript, which was improved considering comments by all  
548 authors, who then accepted the final manuscript.

549

550 **Declaration of interests:**

551 The authors declare no competing interests.

552

553 **References:**

- 554 1. Bowman JL & Eshed Y (2000) Formation and maintenance of the shoot apical meristem.  
555 *Trends in Plant Science* 5(3):110-115.
- 556 2. Groß-Hardt R & Laux T (2003) Stem cell regulation in the shoot meristem. *Journal of Cell*  
557 *Science* 116(9):1659-1666.
- 558 3. Clark SE (2001) Cell signalling at the shoot meristem. *Nature Reviews Molecular Cell*  
559 *Biology* 2(4):276.
- 560 4. Fleming A (2006) Metabolic aspects of organogenesis in the shoot apical meristem.  
561 *Journal of Experimental Botany* 57(9):1863-1870.
- 562 5. Olas JJ, *et al.* (2019) Nitrate acts at the Arabidopsis thaliana shoot apical meristem to  
563 regulate flowering time. *New Phytologist*.
- 564 6. Lauxmann MA, *et al.* (2016) Reproductive failure in Arabidopsis thaliana under transient  
565 carbohydrate limitation: flowers and very young siliques are jettisoned and the meristem is  
566 maintained to allow successful resumption of reproductive growth. *Plant, cell &*  
567 *environment* 39(4):745-767.
- 568 7. Rasmussen S, *et al.* (2013) Transcriptome responses to combinations of stresses in  
569 Arabidopsis. *Plant physiology* 161(4):1783-1794.
- 570 8. Kreps JA, *et al.* (2002) Transcriptome changes for Arabidopsis in response to salt, osmotic,  
571 and cold stress. *Plant physiology* 130(4):2129-2141.
- 572 9. Hilker M, *et al.* (2016) Priming and memory of stress responses in organisms lacking a  
573 nervous system. *Biological Reviews* 91(4):1118-1133.
- 574 10. Stief A, *et al.* (2014) Arabidopsis miR156 regulates tolerance to recurring environmental  
575 stress through SPL transcription factors. *The Plant Cell*:tpc. 114.123851.
- 576 11. Sedaghatmehr M, Mueller-Roeber B, & Balazadeh S (2016) The plastid metalloprotease  
577 FtsH6 and small heat shock protein HSP21 jointly regulate thermomemory in Arabidopsis.  
578 *Nature Communications* 7:12439.
- 579 12. Bäurle I & Trindade IJJoEB (2020) Chromatin regulation of somatic abiotic stress memory.

- 580 13. Jaglo-Ottosen KR, Gilmour SJ, Zarka DG, Schabenberger O, & Thomashow MF (1998)  
581 Arabidopsis CBF1 overexpression induces COR genes and enhances freezing tolerance.  
582 *Science* 280(5360):104-106.
- 583 14. Stockinger EJ, Gilmour SJ, & Thomashow MF (1997) Arabidopsis thaliana CBF1 encodes  
584 an AP2 domain-containing transcriptional activator that binds to the C-repeat/DRE, a cis-  
585 acting DNA regulatory element that stimulates transcription in response to low temperature  
586 and water deficit. *Proceedings of the National Academy of Sciences* 94(3):1035-1040.
- 587 15. Björkman T & Pearson KJ (1998) High temperature arrest of inflorescence development  
588 in broccoli (*Brassica oleracea* var. *italica* L.). *Journal of Experimental Botany* 49(318):101-  
589 106.
- 590 16. Park C-J & Seo Y-S (2015) Heat shock proteins: a review of the molecular chaperones for  
591 plant immunity. *The Plant Pathology Journal* 31(4):323.
- 592 17. Nover L, *et al.* (2001) Arabidopsis and the heat stress transcription factor world: how many  
593 heat stress transcription factors do we need? *Cell Stress & Chaperones* 6(3):177.
- 594 18. Ikeda M, Mitsuda N, & Ohme-Takagi M (2011) Arabidopsis HsfB1 and HsfB2b act as  
595 repressors for the expression of heat-inducible Hsfs but positively regulate the acquired  
596 thermotolerance. *Plant Physiology*:pp. 111.179036.
- 597 19. Charng Y-Y, *et al.* (2007) A heat-inducible transcription factor, HsfA2, is required for  
598 extension of acquired thermotolerance in Arabidopsis. *Plant Physiology* 143(1):251-262.
- 599 20. Lämke J, Brzezinka K, Altmann S, & Bäurle I (2016) A hit-and-run heat shock factor  
600 governs sustained histone methylation and transcriptional stress memory. *The EMBO*  
601 *Journal* 35(2):162-175.
- 602 21. Olas JJ, Fichtner F, & Apelt F (2019) All roads lead to growth: imaging-based and  
603 biochemical methods to measure plant growth. *Journal of Experimental Botany*.
- 604 22. Apelt F, Breuer D, Nikoloski Z, Stitt M, & Kragler F (2015) Phytotyping4D: a light-field  
605 imaging system for non-invasive and accurate monitoring of spatio-temporal plant growth.  
606 *The Plant Journal* 82(4):693-706.
- 607 23. Apelt F, *et al.* (2017) Circadian, carbon, and light control of expansion growth and leaf  
608 movement. *Plant Physiology*:pp. 00503.02017.
- 609 24. Huala E & Sussex IMJTPC (1992) LEAFY interacts with floral homeotic genes to regulate  
610 Arabidopsis floral development. 4(8):901-913.
- 611 25. Ling Y, *et al.* (2018) Thermopriming triggers splicing memory in Arabidopsis. *Journal of*  
612 *Experimental Botany* 69(10):2659-2675.
- 613 26. Lu W, *et al.* (2012) Identification and characterization of fructose 1, 6-bisphosphate  
614 aldolase genes in Arabidopsis reveal a gene family with diverse responses to abiotic  
615 stresses. 503(1):65-74.
- 616 27. Plaxton WCJAropb (1996) The organization and regulation of plant glycolysis. 47(1):185-  
617 214.
- 618 28. Schramm F, *et al.* (2006) The heat stress transcription factor HsfA2 serves as a regulatory  
619 amplifier of a subset of genes in the heat stress response in Arabidopsis. *Plant Molecular*  
620 *Biology* 60(5):759-772.
- 621 29. Liu HC, *et al.* (2018) Distinct heat shock factors and chromatin modifications mediate the  
622 organ-autonomous transcriptional memory of heat stress. *The Plant Journal*.
- 623 30. Bar M & Ori N (2014) Leaf development and morphogenesis. *Development* 141(22):4219-  
624 4230.

- 625 31. Hasanuzzaman M, Nahar K, Alam MM, Roychowdhury R, & Fujita M (2013)  
626 Physiological, biochemical, and molecular mechanisms of heat stress tolerance in plants.  
627 *International Journal of Molecular Sciences* 14(5):9643-9684.
- 628 32. Wigge PA (2013) Ambient temperature signalling in plants. *Current opinion in plant*  
629 *biology* 16(5):661-666.
- 630 33. Olas JJ, Wahl VJPs, & behavior (2019) Tissue-specific NIA1 and NIA2 expression in  
631 *Arabidopsis thaliana*. 14(11):1656035.
- 632 34. Puckett S, *et al.* (2014) Inactivation of fructose-1, 6-bisphosphate aldolase prevents optimal  
633 co-catabolism of glycolytic and gluconeogenic carbon substrates in *Mycobacterium*  
634 *tuberculosis*. 10(5).
- 635 35. Martin T, Frommer WB, Salanoubat M, & Willmitzer L (1993) Expression of an  
636 *Arabidopsis* sucrose synthase gene indicates a role in metabolization of sucrose both during  
637 phloem loading and in sink organs. *The Plant Journal* 4(2):367-377.
- 638 36. Ruan Y-L (2012) Signaling role of sucrose metabolism in development. *Molecular Plant*  
639 5(4):763-765.
- 640 37. Shyh-Chang N & Ng H-H (2017) The metabolic programming of stem cells. *Genes &*  
641 *development* 31(4):336-346.
- 642 38. Corbet C (2018) Stem cell metabolism in cancer and healthy tissues: pyruvate in the  
643 limelight. *Frontiers in pharmacology* 8:958.
- 644 39. Zheng W, Wang P, Zhang H, & Zhou D (2011) Photosynthetic Characteristics of the  
645 Cotyledon and First True Leaf of Castor ('*Ricinus communis*' L.). *Australian Journal of*  
646 *Crop Science* 5(6):702.
- 647 40. Sharma M, Banday ZZ, Shukla BN, & Laxmi A (2019) Glucose-regulated HLP1 acts as a  
648 key molecule in governing thermomemory. *Plant physiology*:pp. 01371.02018.
- 649 41. Liu HC, Liao HT, & Charng YY (2011) The role of class A1 heat shock factors (HSFA1s)  
650 in response to heat and other stresses in *Arabidopsis*. *Plant, Cell & Environment* 34(5):738-  
651 751.

652 **Fig. 1**

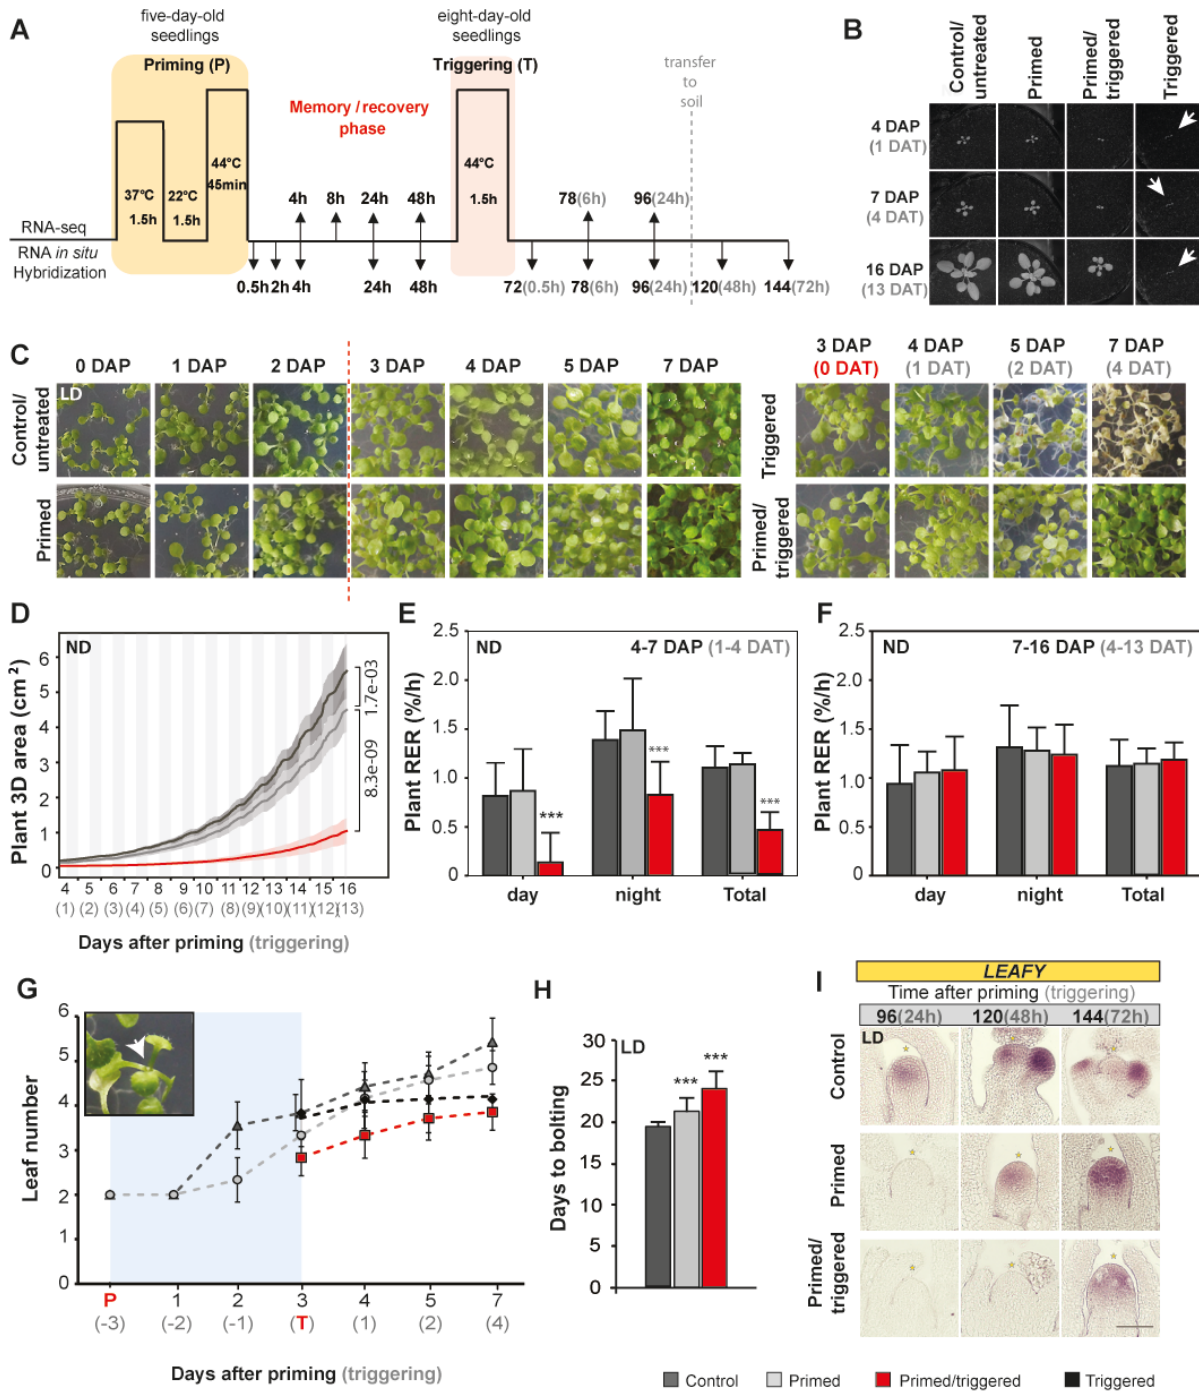

653

654 **Fig. 1.** Growth and development of thermoprimered Col-0 seedlings in neutral day (ND) and long  
 655 day (LD) conditions fully recovers after the treatment. (A) Schematic representation of the  
 656 experimental set-up. Five-day-old seedlings grown in MS media with 1% sucrose were subjected  
 657 to a moderate priming HS at 6h after dawn, followed by a three-days memory/recovery phase, and  
 658 then subjected to a second triggering HS at 9h after dawn. One day after triggering (DAT),

659 seedlings were transferred to soil to monitor growth and development. Samples were taken at  
660 different time points for RNA-seq analysis or RNA *in situ* hybridization. (B-C) Images of Col-0  
661 plants during and after priming (DAP, days after priming) and triggering treatments. Images in  
662 panels (B) and (C) were used for measuring growth behavior after treatment in ND or LD  
663 condition, respectively. (D) Increase of total plant 3D area over time of control (C), primed (P),  
664 and primed and triggered (PT) plants ( $n \geq 6$  for each condition). (E-F) Comparison of mean relative  
665 expansion growth rate (RER, % per h) of control C, P, and PT plants analyzed after the  
666 thermoprimering treatment during day, night, and in total for 4-7 DAP or 7-16 DAP. The data are  
667 calculated from the plot shown in (D). (G) Leaf initiation rate of Col-0 plants grown in LD  
668 conditions ( $n > 10$ ). The memory/recovery phase is marked in blue. (H) Flowering time based on  
669 'days to bolting' in LD conditions ( $n = 20$ ). (I) RNA *in situ* hybridization using a *LEAFY* antisense  
670 probe on longitudinal sections through apices of C, P, and PT plants in LD conditions. Time is  
671 given in hours (h) after priming (black color) and triggering (grey color) treatments. Error bars  
672 indicate s.d.; asterisks indicate a statistically significant difference (Student's *t*-test: \*\* $P \leq 0.01$ ;  
673 \*\*\* $P \leq 0.001$ ) from the control conditions (D-H) or meristem summit (I). Scale bar, 100 $\mu$ m (I).  
674 See also *SI Appendix*, Fig. S1, and Table S1.

675 **Fig. 2**

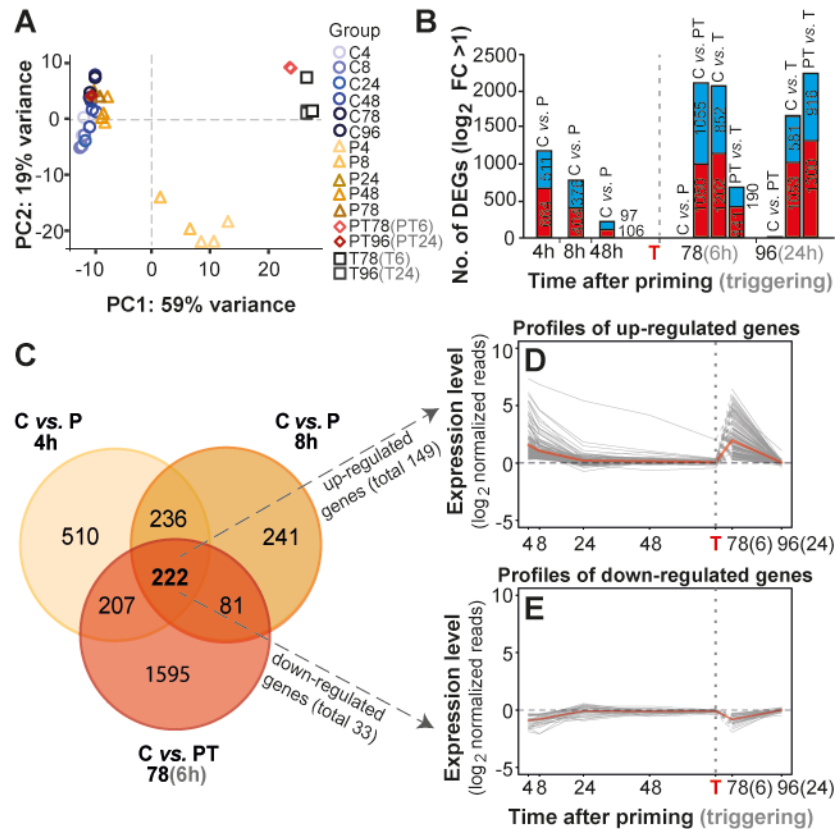

676

677 **Fig. 2.** Identification of thermomemory-associated genes in the shoot apex. (A) Clustering of the  
 678 relationship between meristem samples of control (C), primed (P; triangles), primed and triggered  
 679 (PT; diamonds), and triggered (T; squares) plants during the thermomemory treatment by principal  
 680 component analysis (PCA) forming three groups. (B) Total number of differentially expressed  
 681 genes (DEGs) between the samples at different time points (in brackets are the numbers of up-  
 682 regulated (red) or down-regulated (blue) genes; for details, see Methods). (C) Venn diagram of DEGs at 4h  
 683 and 8h after priming and 6h after triggering compared to the control. The overlap represents  
 684 memory genes at the SAM of Col-0 plants during thermoprimering. (D-E) Profiles of consistently  
 685 up-regulated (D) and consistently down-regulated (E) genes at 4h, 8h, and 78h (6h after triggering)  
 686 after priming compared to control plants. Profiles were calculated by subtracting the normalized  
 687 expression values of untreated control plants from the normalized expression values of P or PT  
 688 plants. The bold red line represents the average profile. The vertical dashed line represents the time  
 689 point of triggering (T) treatment. Time is given in hours (h) after priming (black color) and  
 690 triggering (grey color) treatments. Note, that the SAM of only-T plants is hypersensitive to HS,  
 691 leading to lethality shortly after triggering, therefore, a transcriptomic comparison between PT and  
 692 T plants (alive *versus* dead tissue) was not performed. See also *SI Appendix*, Fig. S2 and S3, Data  
 693 S1.



694 **Fig. 3**

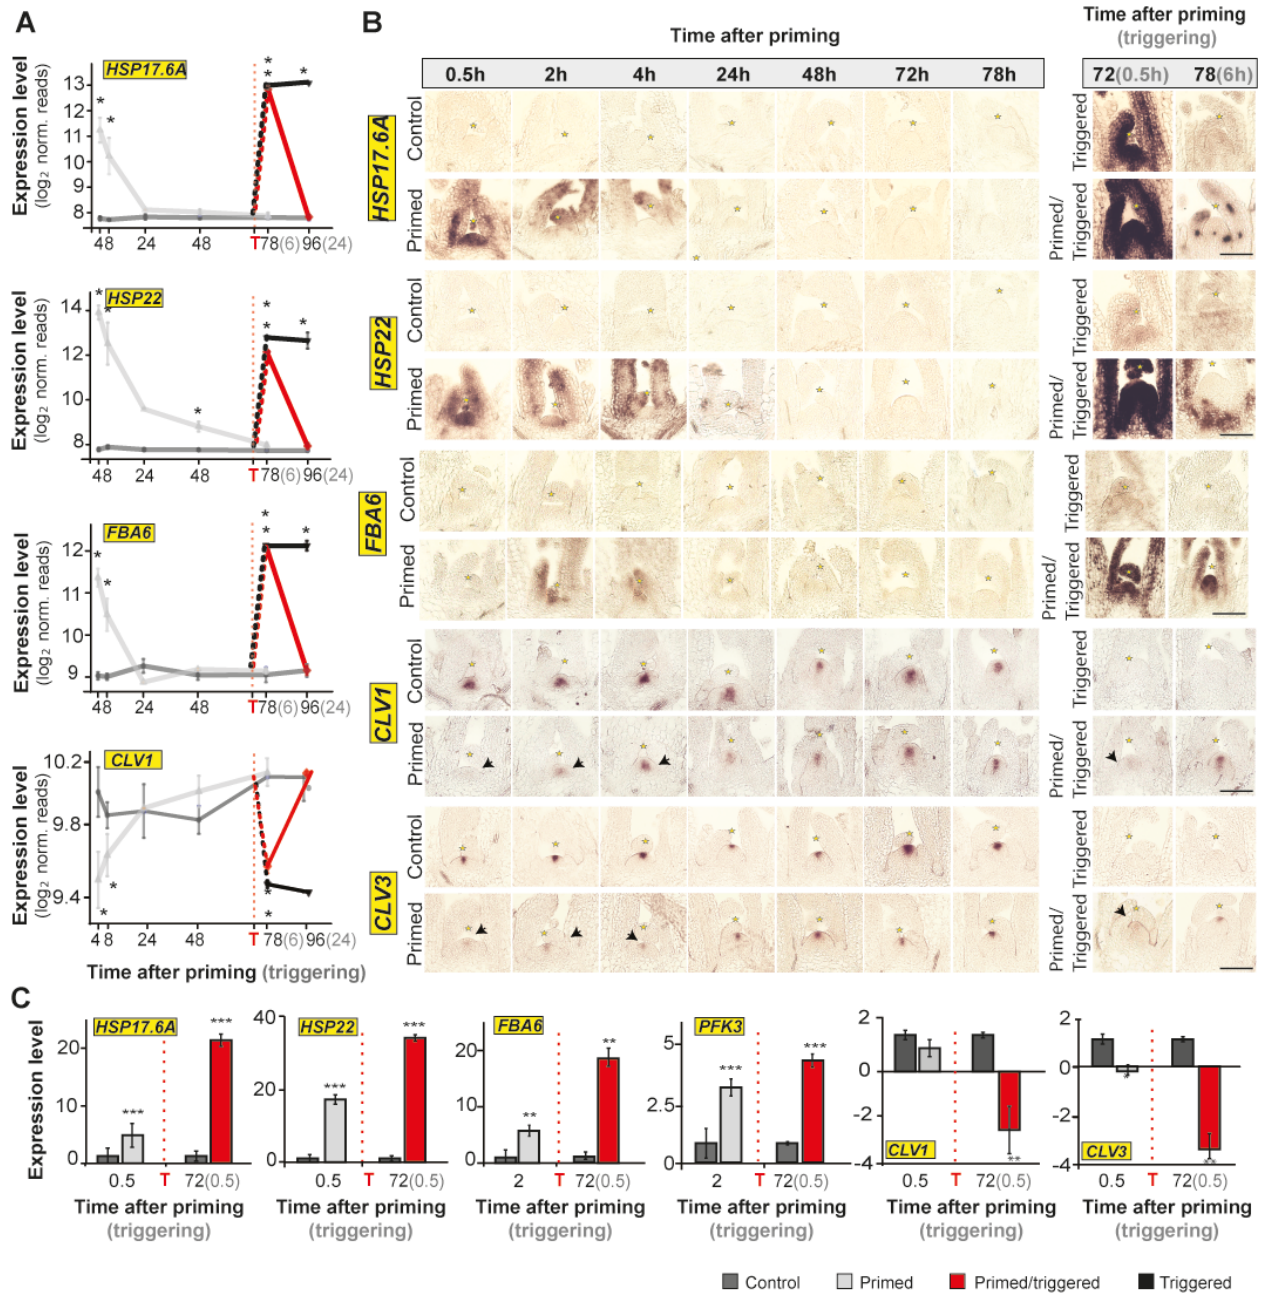

695

696 **Fig. 3.** The shoot apical meristem (SAM) displays priming capacity and a transcriptional memory.  
 697 (A) Relative expression level of HS memory genes: *HEAT SHOCK PROTEIN*s (*HSP17.6A* and  
 698 *HSP22*), *FRUCTOSE-BISPHOSPHATE ALDOLASE 6* (*FBA6*), and *CLAVATA1* (*CLV1*) at the  
 699 shoot apex of Col-0 plants during thermoprimering, obtained by RNA-seq ( $n=3$ ). (B) RNA *in situ*  
 700 hybridization using *HSP17.6A*, *HSP22*, *FBA6*, *CLV1*, and *CLV3* as probes on longitudinal sections  
 701 through meristems of control, primed, primed and triggered, and triggered plants. Scale bars,  
 702 100 $\mu$ m. (C) Expression level of *HSP17.6A*, *HSP22*, *FBA6*, *PFK3*, *CLV1*, and *CLV3* at the SAM  
 703 of Col-0 plants during thermoprimering obtained by qRT-PCR ( $n=3$ ). Note that plants were grown  
 704 in MS media with 1% sucrose. Time is given in hours (h) after priming (black color) and triggering

705 (grey color) treatments. The vertical dashed line represents the time point of triggering (T)  
706 treatment. Error bars indicate s.d. ( $n=3$ ). Asterisks indicate a statistically significant difference  
707 (RNA-seq,  $*P \leq 0.05$  adjusted with Benjamini-Hochberg procedure for multiple testing correction;  
708 qRT-PCR, Student's  $t$ -test:  $**P \leq 0.01$ ;  $***P \leq 0.001$ ) from the control conditions or meristem  
709 summit (*B*). See also *SI Appendix*, Fig. S4.

710 **Fig. 4**

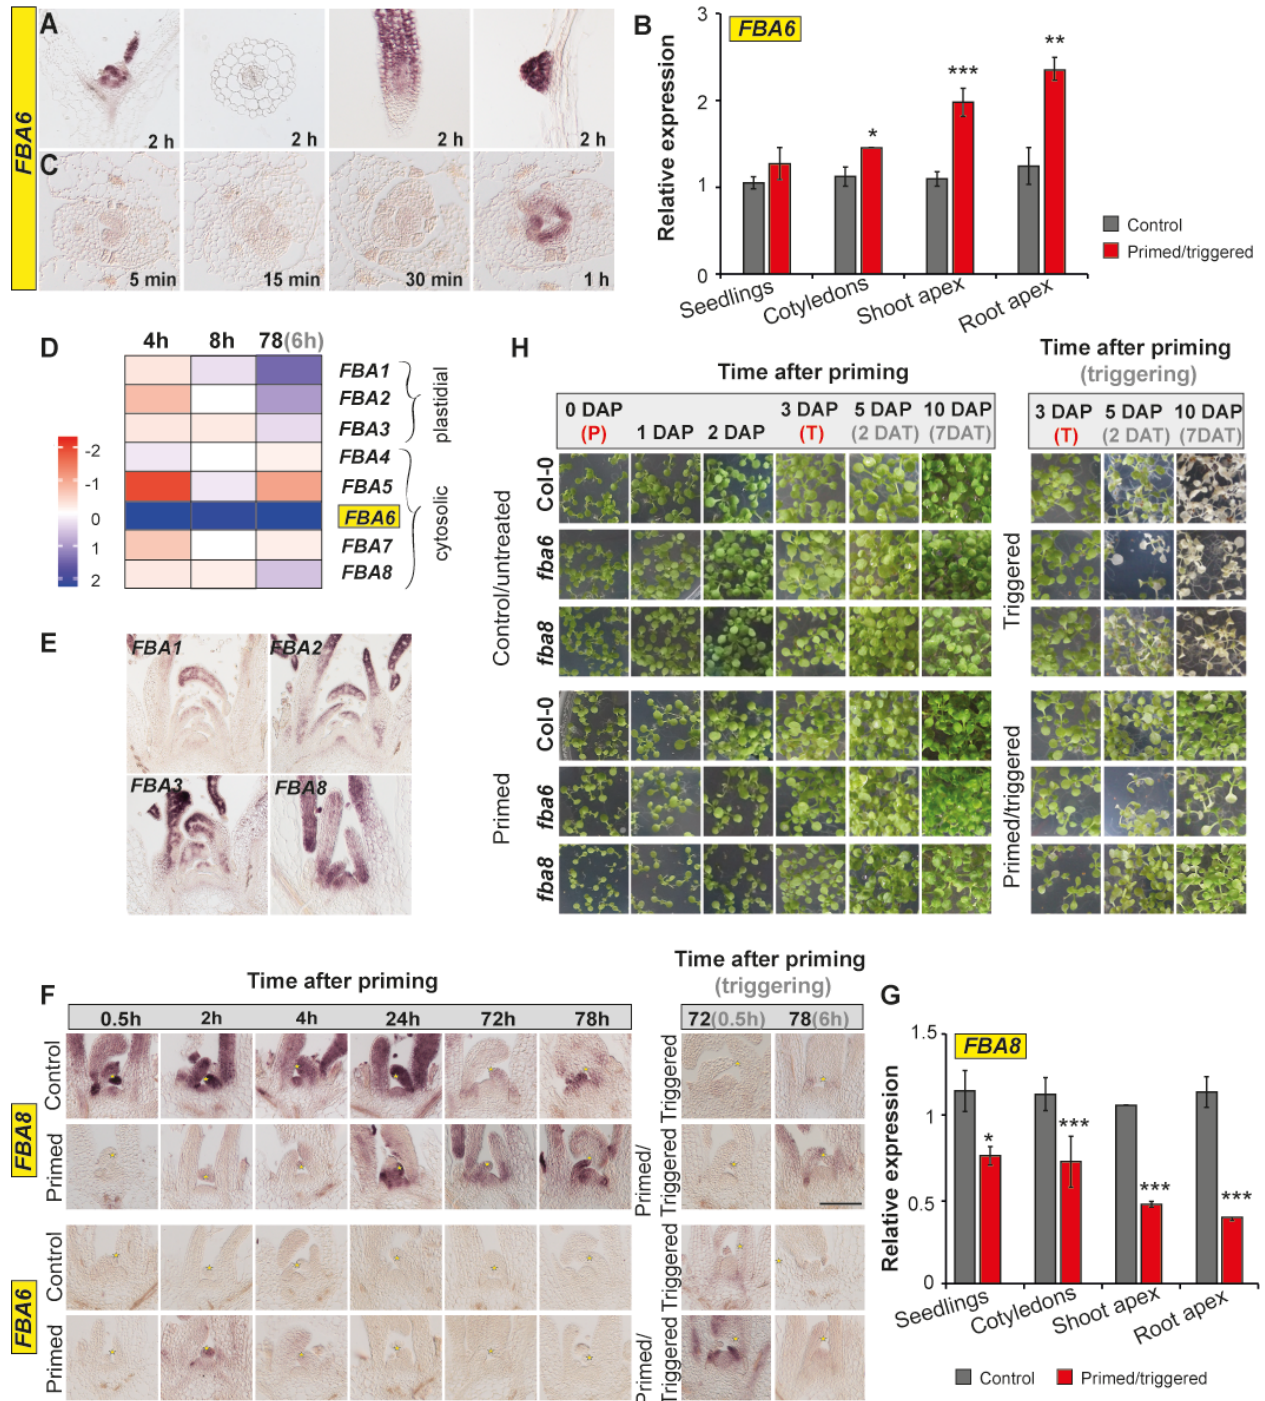

711

712 **Fig. 4.** *FBA6* affects thermomemory in the shoot apical meristem (SAM). (A) Tissue-specific  
 713 expression of *FBA6* in five-day-old Col-0 plants at 2h after priming. (B) *FBA6* expression in eight-  
 714 day-old control and primed and triggered Col-0 seedlings at 0.5h after triggering treatment. (C)  
 715 Time-course expression of *FBA6* at the SAM during priming treatment. (D) Heat map showing  
 716 the log<sub>2</sub> fold change (log<sub>2</sub> FC) of the expression of all eight *FBA* upregulated (blue) or  
 717 downregulated (red) genes in Col-0 shoot apex at 4 and 8h after priming and 6h after triggering

718 compared to the control. (E) Expression pattern of all identified *FBA*s at the SAM during non-  
719 stress conditions. (F) RNA *in situ* hybridization using *FBA8* and *FBA6* as probes on longitudinal  
720 sections through meristems of Col-0 wild type during thermopriming treatment. Scale bar, 100 $\mu$ m.  
721 (G) Tissue-specific expression of *FBA8* in eight-day-old control and primed and triggered Col-0  
722 seedlings at 0.5h after triggering treatment. (H) Growth recovery phenotype of Col-0, *fba6*, and  
723 *fba8* seedlings grown on MS medium with 1% sucrose (Suc) in long-day conditions after priming  
724 (DAP) and triggering (DAT) treatments. Error bars indicate s.d. ( $n=3$ ). Asterisks indicate  
725 statistically significant difference (Student's *t*-test: \*  $P \leq 0.05$ ; \*\*  $P \leq 0.01$ ; \*\*\*  $P \leq 0.001$ ) from the  
726 control conditions or meristem summit (G). See also *SI Appendix*, Fig. S5.

727 **Fig. 5**

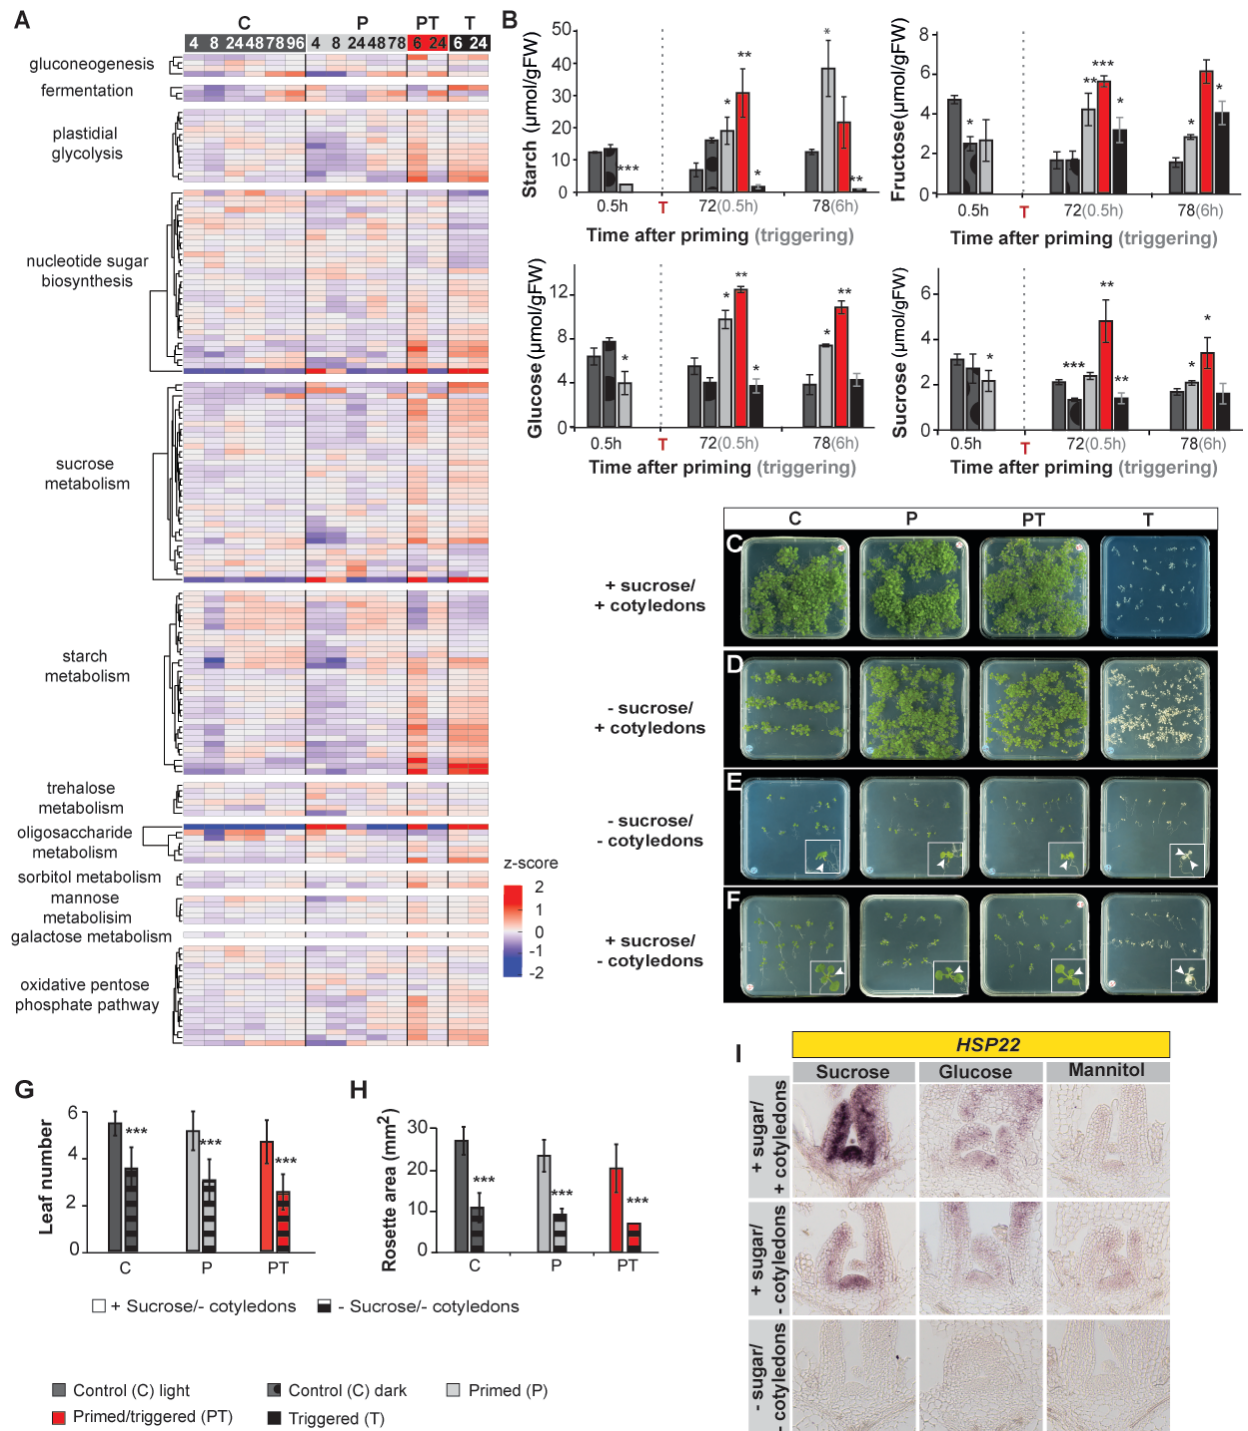

728

729 **Fig. 5.** Thermomemory of the SAM is dependent on sugar availability. (A) Clustered heat map of  
 730 differentially expressed upregulated (red) and downregulated (blue) genes (DEGs) of the  
 731 "Carbohydrate metabolism" category based on level 1 Mapman4 of control (C), primed (P),  
 732 primed/triggered (PT) and triggered (T) shoot apex samples. Note, that the 6 and 24h time points

733 after triggering in PT and T plants correspond to 78 and 96h after priming in C and P plants. The  
734 color scale represents z-score values. (B) Soluble sugars and starch content in seedlings during  
735 thermopriming. Note that plants were grown in MS media with 1% sucrose. (C-F) Thermopriming  
736 assay with Col-0 seedlings grown on MS medium with 1% sucrose (Suc; C) or without (D). (E-F)  
737 Col-0 seedlings with detached cotyledons grown on MS medium without (E) or with (F) 1%  
738 sucrose. Note, cotyledons were detached before the priming treatment. Images were taken 10 days  
739 after priming (DAP; 7 days after triggering (7 DAT)). (G-H) Number of visible leaves (G) and  
740 rosette area (H) in control, primed, and primed and triggered seedlings with detached cotyledons  
741 grown with or without 1% sucrose in the medium analyzed at 7 DAT. (I) Expression pattern of HS  
742 memory gene *HSP22*, determined by RNA *in situ* hybridization on longitudinal sections through  
743 meristems of Col-0 wild-type plants grown on sucrose, glucose, mannitol, and no-sugar media,  
744 with or without cotyledons. Time is given in hours (h) after priming (black color) and triggering  
745 (grey color) treatments. The vertical dashed line represents the time point of triggering (T)  
746 treatment. Error bars indicate s.d. ( $n=3$ ). Asterisks indicate statistically significant difference  
747 (Student's *t*-test: \* $P \leq 0.05$ ; \*\* $P \leq 0.01$ ; \*\*\* $P \leq 0.001$ ) from control (light) conditions. See also *SI*  
748 *Appendix*, Fig. S6.

749 **Fig. 6**

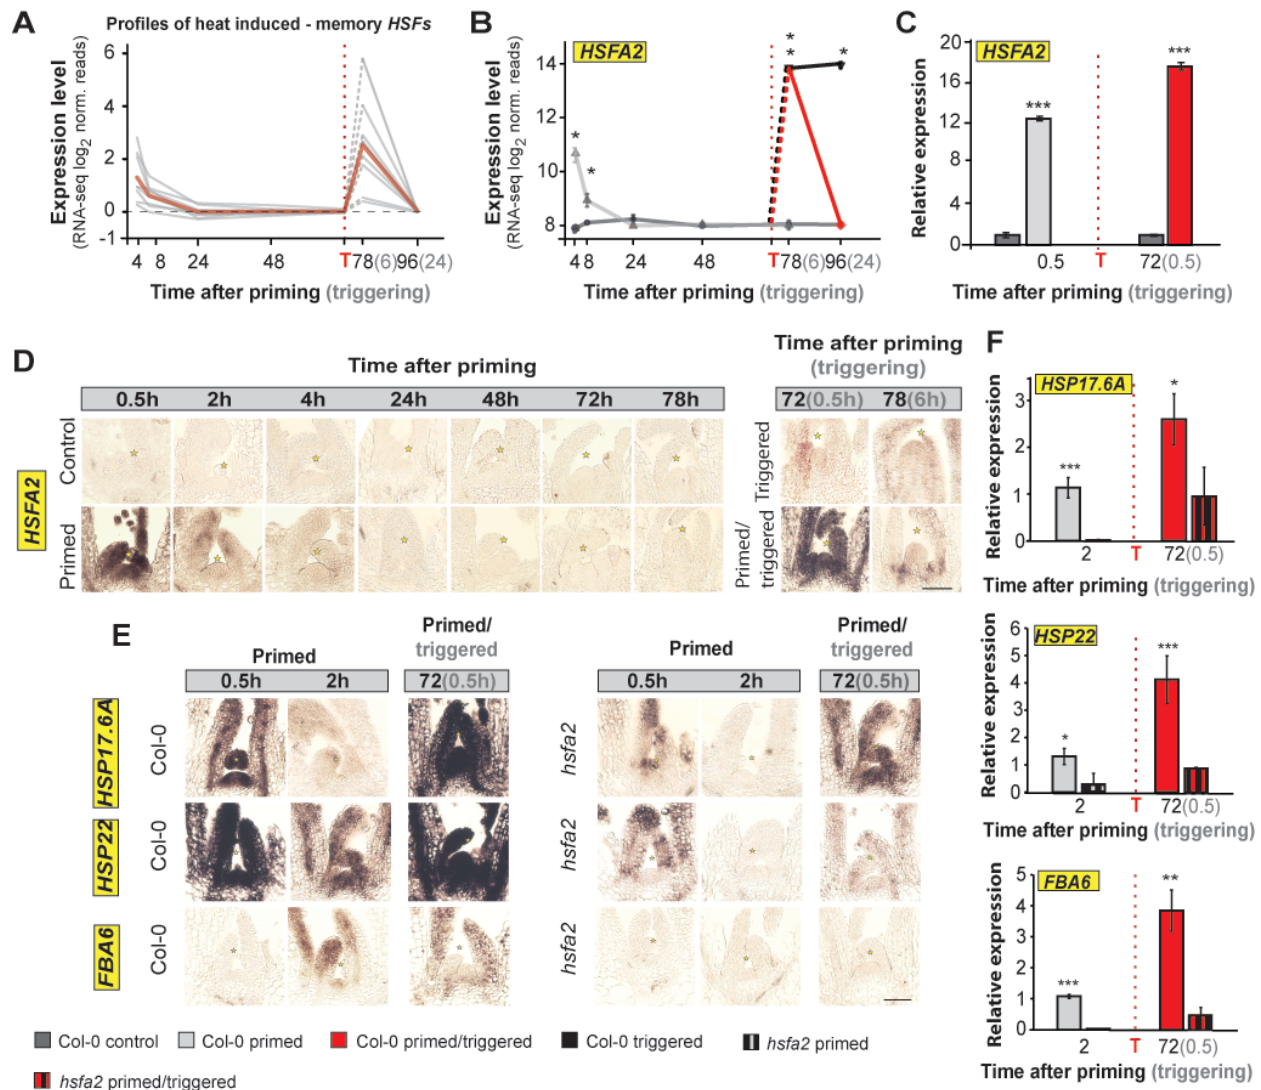

750

751 **Fig. 6.** HSF2 is required, but not sufficient, for full transcriptional memory in the shoot apex. (A)  
 752 Profiles of consistently heat up-regulated *HEAT SHOCK TRANSCRIPTION FACTORS* (HSFs) at  
 753 the SAM of Col-0 seedlings at 4h, 8h, and 78h (6h after triggering) after priming compared to  
 754 control plants. The bold red line represents the average profile. (B-C) Relative expression level of  
 755 *HSFA2* at the SAM of Col-0 plants during thermoprimering obtained by (B) RNA-seq and (C) qRT-  
 756 PCR of control plants (dark grey), primed plants (light grey), primed and triggered plants (red),  
 757 and triggered plants (black) ( $n=3$ ). (D-E) RNA *in situ* hybridization using transcript-specific  
 758 probes for (D) *HSFA2*, (E) *HEAT SHOCK PROTEINS* (*HSP17.6A* and *HSP22*), and *FRUCTOSE*  
 759 *BISPHOSPHATE ALDOLASE 6* (*FBA6*) on longitudinal sections through meristems of Col-0 and  
 760 *hsfa2* mutant plants. Scale bars, 100 $\mu$ m. (F) Relative expression level of *HSP17.6A*, *HSP22*, and  
 761 *FBA6* measured at the SAM of Col-0 and *hsfa2* mutant plants during thermoprimering. Note that  
 762 plants were grown in MS media with 1% sucrose. Time is given in hours (h) after priming (black  
 763 color) and triggering (grey color) treatments. The vertical dashed line represents the time point of  
 764 triggering (T). Error bars indicate s.d. ( $n=3$ ). Asterisks indicate meristem summit of

765 statistically significant difference (Student's *t*-test: \* $P \leq 0.05$ ; \*\* $P \leq 0.01$ ; \*\*\* $P \leq 0.001$  (*C, F*) or  
766 \* $P \leq 0.05$  adjusted with Benjamini-Hochberg procedure for multiple testing correction (*B*)) from  
767 Col-0. See also *SI Appendix*, Figs. S7 and S9.



768 **Fig.7**

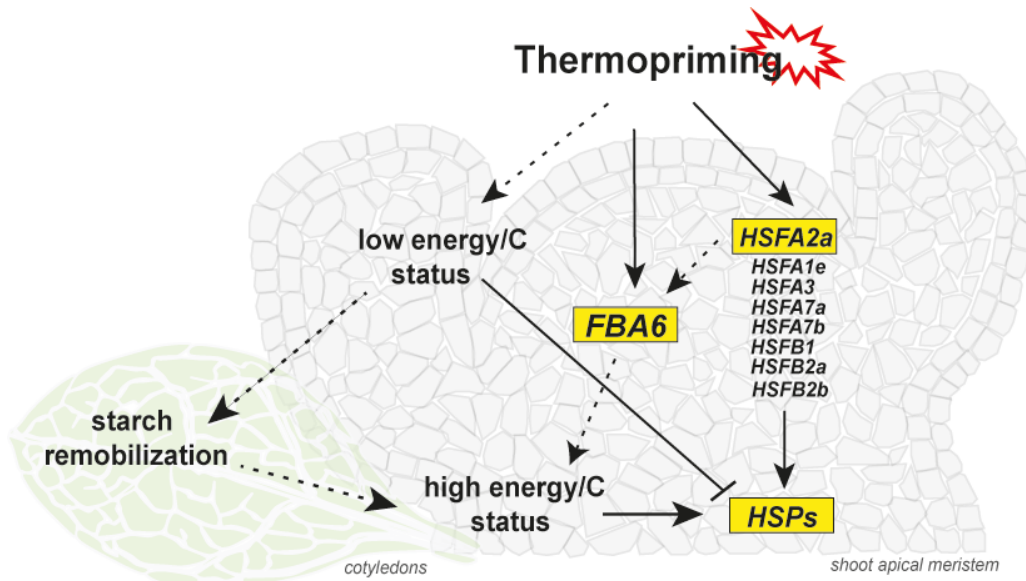

769

770 **Fig. 7.** A minimal model for the regulation of heat stress (HS) memory at the shoot apical meristem  
771 (SAM). The SAM shows thermopriming capacity and HS transcriptional memory. Thermopriming  
772 induces the expression of specific HSFs at the SAM, including the master regulator HSFA2. HSFs  
773 might directly bind to HSE in the 5' upstream regulatory regions of memory genes identified at  
774 the SAM. Further, the priming HS affects the sugar availability in plants and activates the  
775 expression of primary carbohydrate metabolism genes. Solid lines, direct interactions; dashed  
776 lines, indirect interactions.

777

**Supplementary Information Appendix:**

**Primary carbohydrate metabolism genes participate in heat stress memory in the shoot apical meristem of *Arabidopsis thaliana***

Justyna Jadwiga Olas, Federico Apelt, Maria Grazia Annunziata, Sarah Isabel Richard, Saurabh Gupta, Friedrich Kragler, Salma Balazadeh, Bernd Mueller-Roeber

**This PDF file includes:**

Materials and Methods

Figures S1 - S9

Tables S1 - S5

## Materials and Methods

**Plant material and growth conditions.** *Arabidopsis thaliana* seedlings (ecotype Col-0) were grown in 0.5 Murashige and Skoog (MS) agar media with or without 1% sucrose (w/v) under long-day (LD; 16h light/8h darkness) or neutral-day (ND; 12h light/12h darkness) conditions at 22°C with a photosynthetically active radiation of 160  $\mu\text{mol m}^{-2}\text{s}^{-1}$ . The thermomemory protocol was performed as reported (1). Briefly, 5-day-old seedlings were subjected to priming stimulus at 6h after dawn (1.5h at 37°C; recovery at 22°C for 1.5h; 45min at 44°C), afterwards returned to normal growth conditions (22°C) for 3 days, and then subjected to the triggering treatment (1.5h at 44°C). All thermoprimering treatments were performed in a water bath. Seedlings were grown in agar plates until one day after triggering (DAT; 4DAP, days after priming); afterwards, plants were transferred to soil to monitor the growth and development. The *hsfa2-1* mutants were previously reported (2). The *fba6* (SAIL\_882\_C03) and *fba8* mutants were obtained from the NASC collection, and homozygous lines were confirmed by PCR using the primers presented in Table S5.

**Growth analysis.** Plant rosette area and relative expansion growth rate (RER) of control (unprimed; C;  $n=8$ ), primed (P;  $n=10$ ), primed and triggered (PT;  $n=6$ ), and triggered (T;  $n=10$ ) Col-0 plants grown in ND conditions were analyzed using an established three-dimensional camera-based imaging system with high accuracy and time resolution (3, 4). Briefly, plants were continuously imaged using noninvasive near-infrared light in a growth chamber (model E-36L; Percival Scientific; <http://www.percival-scientific.com/>), starting one day after triggering (DAT) with photosynthetically active radiation of 160  $\mu\text{mol m}^{-2}\text{s}^{-1}$  at the plant level.

In LD conditions, the rosette area of C, P, PT, and T plants ( $n\geq 15$ ) was determined using the Fiji platform for biological-image analysis (5). The leaf initiation rate (LIR) was analyzed by counting the number of leaves produced by plants every day at the same time point. Additionally, for plants grown at LD, the LIR was determined by dividing the total leaf number (TLN) by the days to bolting (DTB).

**Flowering time analysis.** Flowering time was defined by (i) ‘days to bolting’ (DTB), which is the day on which the first flower bud was visible after germination and the main stem had bolted to 0.5 cm, and (ii) by ‘total leaf number’ (TLN) (see Table S1).

**RNA extraction and RNA-sequencing (RNA-seq).** Total RNA was isolated from three biological replicates, each containing more than 60 hand-dissected SAMs, using the Qiagen RNeasy Mini kit (Qiagen, Hilden, Germany) or the mirVana™ miRNA Isolation Kit (Invitrogen/Life Technologies, Darmstadt, Germany). Shoot apices were collected 4h, 8h, 24h, 48h, and 78h after the priming (P plants), from control plants (unprimed; C) at the same time points, and from C, P, triggered (unprimed; T), and primed and triggered (PT) plants at 6h and 24h after the triggering. The time points 6h and 24h after triggering correspond to 78h and 96h after priming, respectively.

Library preparation and sequencing were performed by LGC Genomics (Berlin, Germany); Illumina NextSeq 500 V2 was used to generate 75-bp single reads with an average number of  $\geq 100$  million reads per sample (Data S1). The adapter-clipped reads were filtered for rRNA and organelle sequences using SortMeRNA (version 2.1b) (6). We used STAR (version 2.5.2b) to align the reads to the TAIR10 annotation of the genome of *Arabidopsis thaliana* and counted the reads per gene using HTSeq (version 0.9.1) (7). Generally, more than 80% of the reads could be uniquely matched to the annotated genes (Data S1). Subsequent analysis of the count data was performed in R (version 3.5.1) (8). The data were normalized by applying variance stabilizing transformation (VST) using DESeq2 (version 1.20.0) (9) for expression pattern plotting. Euclidean distance and Pearson correlation were pairwise calculated between the normalized samples identifying four outlier samples that were filtered (for details see *SI Appendix*, Fig. S2). Furthermore, to increase the power of the subsequent differential gene expression (DE) analysis, for each triplicate we filtered samples whose average Euclidean distance to the remaining two triplicates was more than 50% higher as the distance of the other two replicates to each other, resulting in three additional filtered samples. Thus, the filtered dataset contains 38 samples from 15 different experimental conditions having triplicates or duplicates, except for 24h after priming (P24), which remains a single sample due to the filtering and makes DE analysis including time point P24 not feasible; however, it allows representation without standard deviation in time-course plots (see, e.g., Figs. 3 and 4 and *SI Appendix*, Fig. S4, S6, and S7). DE analysis was performed using DESeq2 and

edgeR (version 3.22.3) (10, 11) with the criteria of a  $\geq 2$ -fold up-/down-regulation with an adjusted *P*-value (using Benjamini-Hochberg procedure for multiple testing correction) of less than 0.05 for both methods. The clustered heat maps were generated using DESeq-normalized expression counts of differentially expressed genes (DEGs) belonging to ‘Carbohydrate metabolism’, based on level 1 Mapman4 annotations and were plotted using the ComplexHeatmap package (12). The level 1 annotations were further classified into respective level 2 annotations.

**Identification of hyper-induced memory genes.** All 182 high-confidence memory genes were analyzed for hyper-induction by testing if the expression level of gene X in PT plants was significantly higher (for up-regulated memory genes) or significantly lower (for down-regulated memory genes) after triggering (78h) compared to the expression level of the same genes in primed plants after priming (P4). The expression levels for the treated plants were normalized by subtracting the mean expression value from control plants for the corresponding time points. Statistical tests were performed using two-tailed, two-sample equal variance Student's *t*-test considering *P*-values  $\leq 0.05$  as significant.

**cDNA synthesis and qRT-PCR.** DNA digestion and cDNA synthesis were performed using Turbo DNA-free DNase I kit (Ambion/Life Technologies, Darmstadt, Germany) and SuperScript III Reverse Transcriptase kit (Invitrogen/Life Technologies, Darmstadt, Germany), respectively. The qRT-PCR measurements were performed in triplicates using SYBR Green-PCR Master Mix (Applied Biosystems/Life Technologies, Darmstadt, Germany). Expression values of analyzed genes were presented in graphs as mRNA fold change. Fold change was calculated by the  $\log_2$ -normalized  $\Delta$ CT to the maximum value of control treatment. The primer sequences for the reference genes and selected genes analyzed are listed in *SI Appendix*, Table S5.

**Toluidine blue staining and RNA *in situ* hybridization.** The apices of Col-0 plants grown in LD condition were harvested into formaldehyde/acetic acid/ethanol (FAA) fixative solution at 0.5, 2, 4, 24, 48, 72, 78, 96, 120, 144, 168, 192 and 216 hours after the priming (time after priming, TAP, 1<sup>st</sup> stimulus) and at 0.5, 6, 24, 48, 72, 96, 120 and 144 hours after triggering (time after triggering, TAT, 2<sup>nd</sup> stimulus) treatments. The following time points after priming correspond to time points after triggering: 72TAP (0.5TAT), 78TAP (6TAT), 96TAP (24TAT), 120TAP (48TAT), 144TAP

(72TAT), 168TAP (96TAT), 192 TAP (120TAT), and 216TAP (144TAT) (see Fig. 1A). In addition, the meristems of the *hsfa2-1* mutant were harvested at 0.5 and 2h after priming, and at 0.5h after triggering treatments. After harvesting, the apices were fixed, embedded into wax using an automated tissue processor (Leica ASP200S, Leica, Wetzlar, Germany) and an embedding system (HistoCore Arcadia, Leica). Sections of 8 $\mu$ m thickness were prepared using a rotary microtome (Leica RM2255; Leica). Briefly, toluidine blue staining was carried out by dewaxing the slides containing longitudinal sections through apices with HistoClear and an ethanol series: 100% EtOH for 2 min, 100% EtOH for 2 min, 95% of EtOH for 1 min, 90% of EtOH for 1 min, 80% EtOH for 1 min, 60% EtOH + 0.75% of NaCl for 1 min, 30% EtOH + 0.75% of NaCl for 1 min, 0.75% NaCl for 1 min, and phosphate-buffered saline (PBS) for 1 min. After dewaxing, slides were shortly left to dry at 42°C and then incubated in 0.01% toluidine blue/sodium borate solution for 2 min, and then briefly washed with water and 80% EtOH. The sections were imaged with a Nikon Eclipse E600 microscope using NIS-Elements BR 4.51.00 software.

For RNA *in situ* hybridization, slides with sections through apices, roots, hypocotyls were washed with HistoClear solution (Biozym Scientific, Hessisch Oldendorf, Germany), and ethanol series, and Proteinase K (Roche, Mannheim, Germany). Slides were hybridized with selected probes overnight. Probes were generated from their cDNAs cloned into pGEM-T Easy Vector (Promega, Madison, Wisconsin, USA; oligo sequences are provided in Table S5) and synthesized using DIG RNA Labeling Kit (Roche). Afterwards, slides were washed out and incubated with 1% blocking reagent (Roche) in 1xTBS/0.1% Triton X-100. For immunological detection, the anti-DIG antibody (Roche) solution, diluted 1:1,250 in blocking reagent, was applied to the slides. For colorimetric detection, the NBT/BCIP stock solution (Roche), diluted 1:50 in 10% polyvinyl alcohol (PVA) in TNM-50, was applied to the slides. The slides were incubated overnight and imaged as described above. Figure panels were generated in Adobe Photoshop CS5 and Illustrator CC (Adobe Systems, San Jose, USA).

**Iodine staining and metabolite measurements.** For iodine staining, whole seedlings of Col-0 plants were harvested to 80% ethanol and boiled for 10 min, then incubated in an iodine solution (50% (v:v) Lugol's solution) for 10 min. Excess solution was removed by washing the seedlings in water. Soluble sugars and starch content were measured in Col-0 seedlings in three biological

replicates ( $n=3$ ). Briefly, glucose, fructose, and sucrose were determined enzymatically from ethanolic extract as described (13). Starch was assayed enzymatically using pellet material (14).

**Statistical analysis.** Statistical significance between treatments was calculated using two-tailed, two-sample equal variance Student's  $t$ -test:  $*P \leq 0.05$ ;  $**P \leq 0.01$ ;  $***P \leq 0.001$  (Figs. 1, 3, 4, 5, 6 and *SI Appendix*, Figs. S1, S4, S8). For testing the statistical difference of RNA-seq derived gene expression levels, adjusted  $P$ -values were calculated by DESeq2 and edgeR with the Benjamini-Hochberg (BH) procedure for multiple testing correction ( $*P \leq 0.05$ ) with the additional criterion of a  $\geq 2$ -fold up-/down-regulation (Figs. 3 and 6 and *SI Appendix*, Figs. S4, S7, S8). Statistical significance of the enrichment of HSE motifs in 5' regulatory regions of memory genes was calculated using the hypergeometric test compared to the regulatory regions of all TAIR10 annotated genes using the basic HSE (5'-nGAAnnTTCn-3') and perfect HSE definition (5'-GAAnnTTCnnGAA-3').

## References:

1. Stief A, *et al.* (2014) Arabidopsis miR156 regulates tolerance to recurring environmental stress through SPL transcription factors. *The Plant Cell*:tpc. 114.123851.
2. Charng Y-Y, *et al.* (2007) A heat-inducible transcription factor, HsfA2, is required for extension of acquired thermotolerance in Arabidopsis. *Plant Physiology* 143(1):251-262.
3. Apelt F, Breuer D, Nikoloski Z, Stitt M, & Kragler F (2015) Phytotyping4D: a light-field imaging system for non-invasive and accurate monitoring of spatio-temporal plant growth. *The Plant Journal* 82(4):693-706.
4. Apelt F, *et al.* (2017) Circadian, carbon, and light control of expansion growth and leaf movement. *Plant Physiology*:pp. 00503.02017.
5. Schindelin J, *et al.* (2012) Fiji: an open-source platform for biological-image analysis. *Nature Methods* 9(7):676.
6. Kopylova E, Noé L, & Touzet H (2012) SortMeRNA: fast and accurate filtering of ribosomal RNAs in metatranscriptomic data. *Bioinformatics* 28(24):3211-3217.
7. Anders S, Pyl PT, & Huber W (2015) HTSeq—a Python framework to work with high-throughput sequencing data. *Bioinformatics* 31(2):166-169.
8. Team RC (2013) R: A language and environment for statistical computing.
9. Love MI, Huber W, & Anders S (2014) Moderated estimation of fold change and dispersion for RNA-seq data with DESeq2. *Genome Biology* 15(12):550.
10. Robinson S, *et al.* (2013) Mechanical control of morphogenesis at the shoot apex. *Journal of experimental botany* 64(15):4729-4744.
11. McCarthy DJ, Chen Y, & Smyth GK (2012) Differential expression analysis of multifactor RNA-Seq experiments with respect to biological variation. *Nucleic Acids Research* 40(10):4288-4297.
12. Gu Z, Eils R, & Schlesner MJB (2016) Complex heatmaps reveal patterns and correlations in multidimensional genomic data. 32(18):2847-2849.
13. Stitt M, Lilley RM, Gerhardt R, & Heldt HW (1989) Metabolite levels in specific cells and subcellular compartments of plant leaves. *Methods in Enzymology*, (Elsevier), Vol 174, pp 518-552.
14. Hendriks JH, Kolbe A, Gibon Y, Stitt M, & Geigenberger P (2003) ADP-glucose pyrophosphorylase is activated by posttranslational redox-modification in response to light and to sugars in leaves of Arabidopsis and other plant species. *Plant Physiology* 133(2):838-849.



## Supplementary Figures

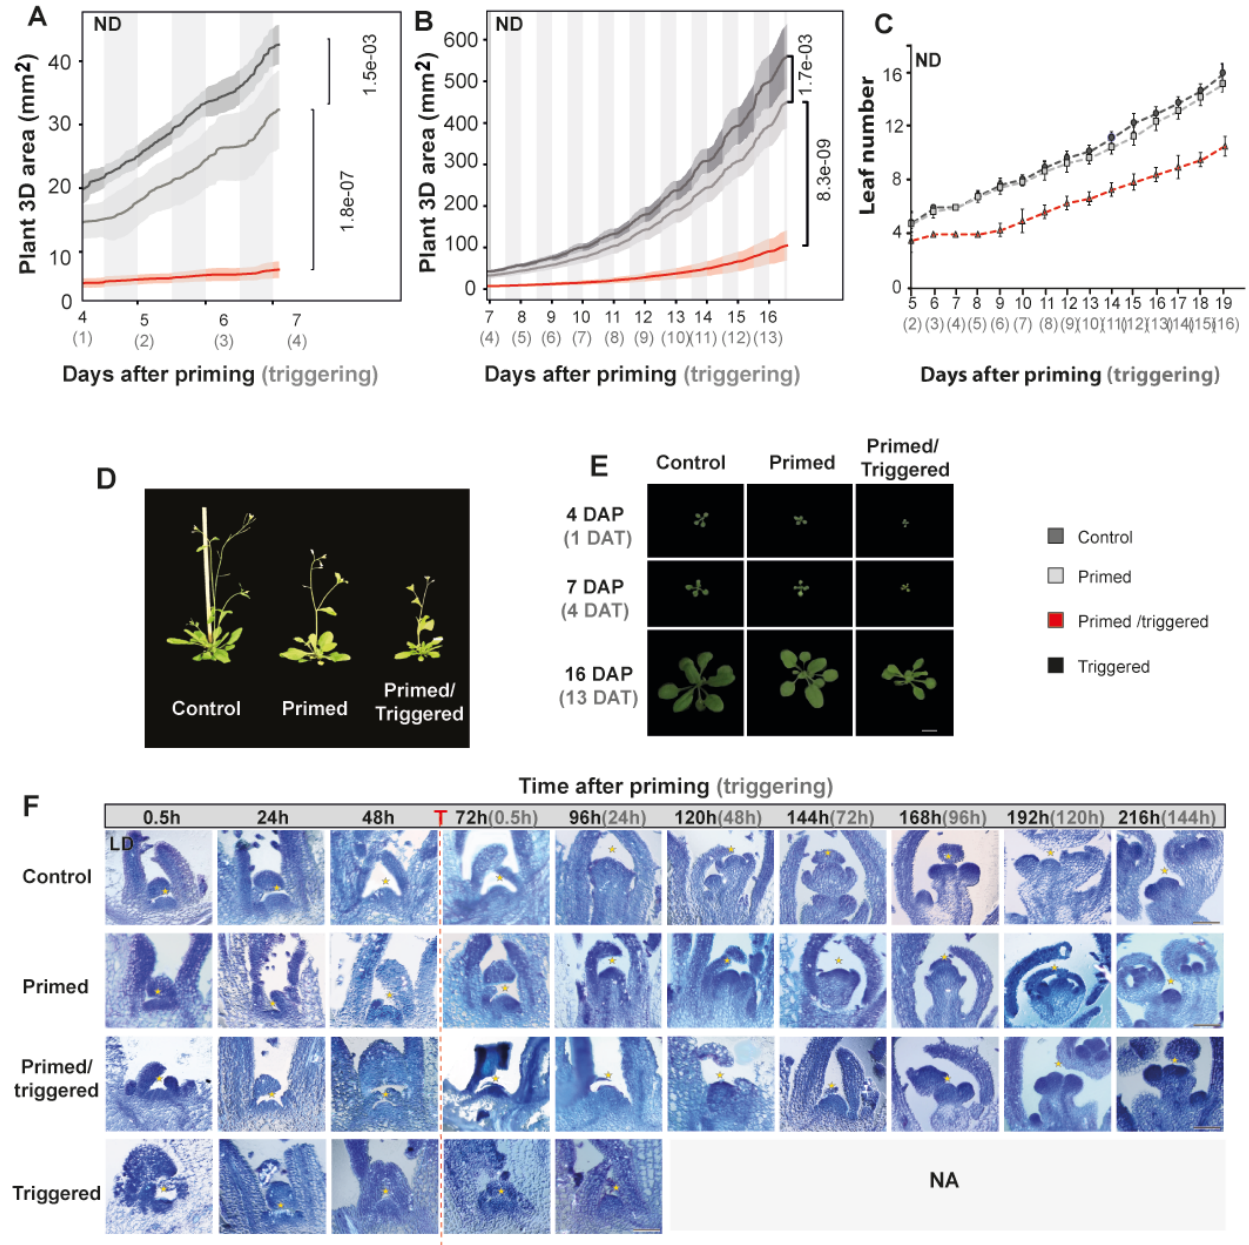

**Fig. S1.** Morphological analyses of wild-type (Col-0) plants grown in long day (LD) and neutral (ND) conditions during and after thermoprimering. (A, B) Increase of total 3D area over time of control (C), primed (P) and primed and triggered (PT) plants grown in ND photoperiod, analysed using the Phenotyping<sup>4D</sup> platform (A, B). Note, seedlings that only obtained the triggering (T) stimulus died. (C) Leaf initiation rate analyzed in ND conditions determined by counting the appearance of 2mm-sized leaves throughout vegetative development. (D) Flowering time phenotype of Col-0 plants after thermoprimering. (E) Images of Col-0 plants after priming (DAP) and triggering (DAT) treatments. (F) Toluidine blue-stained longitudinal sections through apices of C, P, PT and T plants after thermoprimering in LD. Note, morphological analysis

of the meristem of T plants was performed until 96h after priming (24h after triggering). Due to lethality of the plants further time points were not analyzed (NA). Time is given in hours (h) after priming (black color) and triggering (grey color) treatment. The vertical dashed line represents the time point of triggering (T) treatment. Error bars indicate s.d. Asterisks indicate meristem summit. Scale bars, 1cm (*E*) and 100 $\mu$ m (*F*).

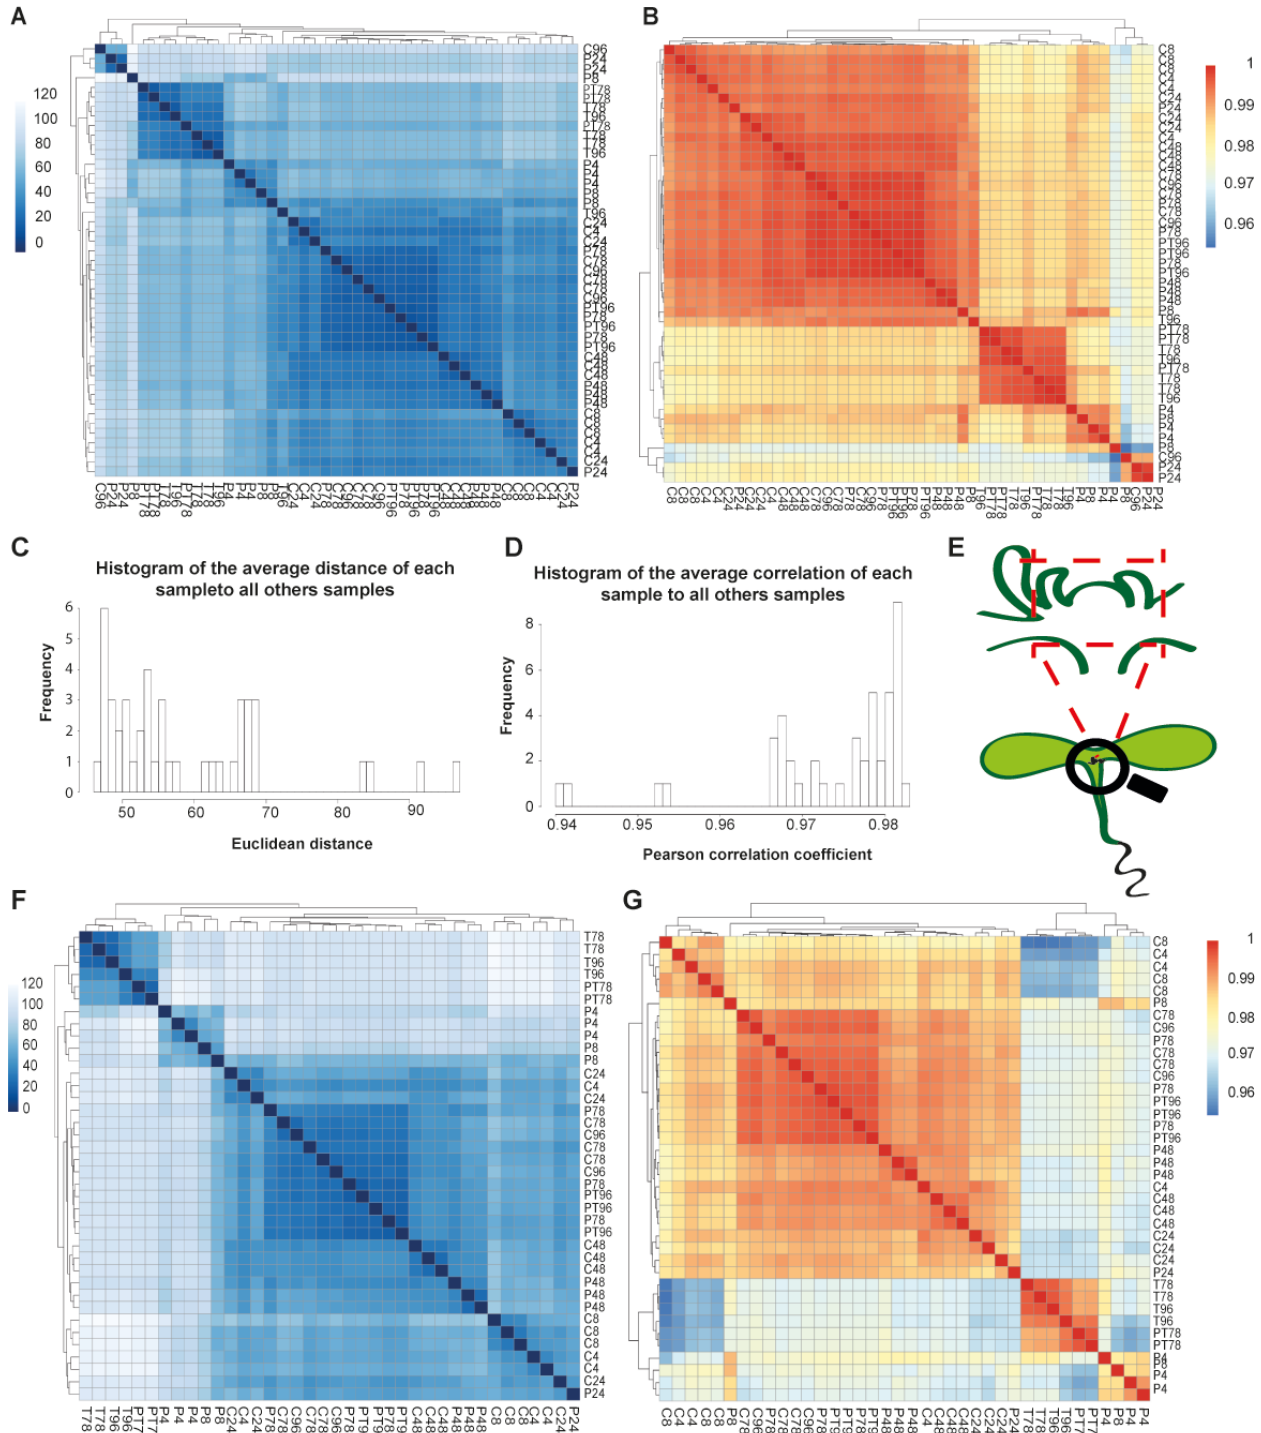

**Fig. S2.** Clustering of gene expression patterns of all 45 samples after variance stabilizing transformation (VST) of the DESeq2 package. (A) Heatmap of the distance matrix of all 45 samples using pairwise Euclidean distance. (B) Heatmap of the correlation matrix of all 45 using pairwise Pearson correlation. (C) Histogram of the average distance of each sample to other samples. (D) Histogram of the average correlation of each sample to all other samples. Note, both clustering approaches revealed four outlier samples (sample degradation or/and low number of reads) with an average Euclidean distance of  $\geq 80$  and a Pearson correlation value of  $< 0.96$ ; those samples were removed for further analysis (1x P8, 2x P24, 1x

C96). Furthermore, to increase the power of the differential gene expression (DE) analysis, for each triplicate we filtered samples whose average Euclidean distance to the remaining two triplicates is more than 50% higher than the distance of the other two replicates to each other (1x PT78, 1x T78, 1x T96). Thus, the filtered dataset contains 38 samples from 15 different experimental conditions with triplicates or duplicates with the exception of P24, which remains a single sample that makes DE analysis at 24h after priming not feasible, however, allows representation without standard deviation in time-course plots (see e.g. Fig. 3, and *SI Appendix*, Fig, S4 and S8). (E) Schematic representation of the material harvested and used for RNA-seq analysis. (F) Heatmap of the distance matrix of 38 samples using pairwise Euclidean distance. (B) Heatmap of the correlation matrix of 38 samples using pairwise Pearson correlation.

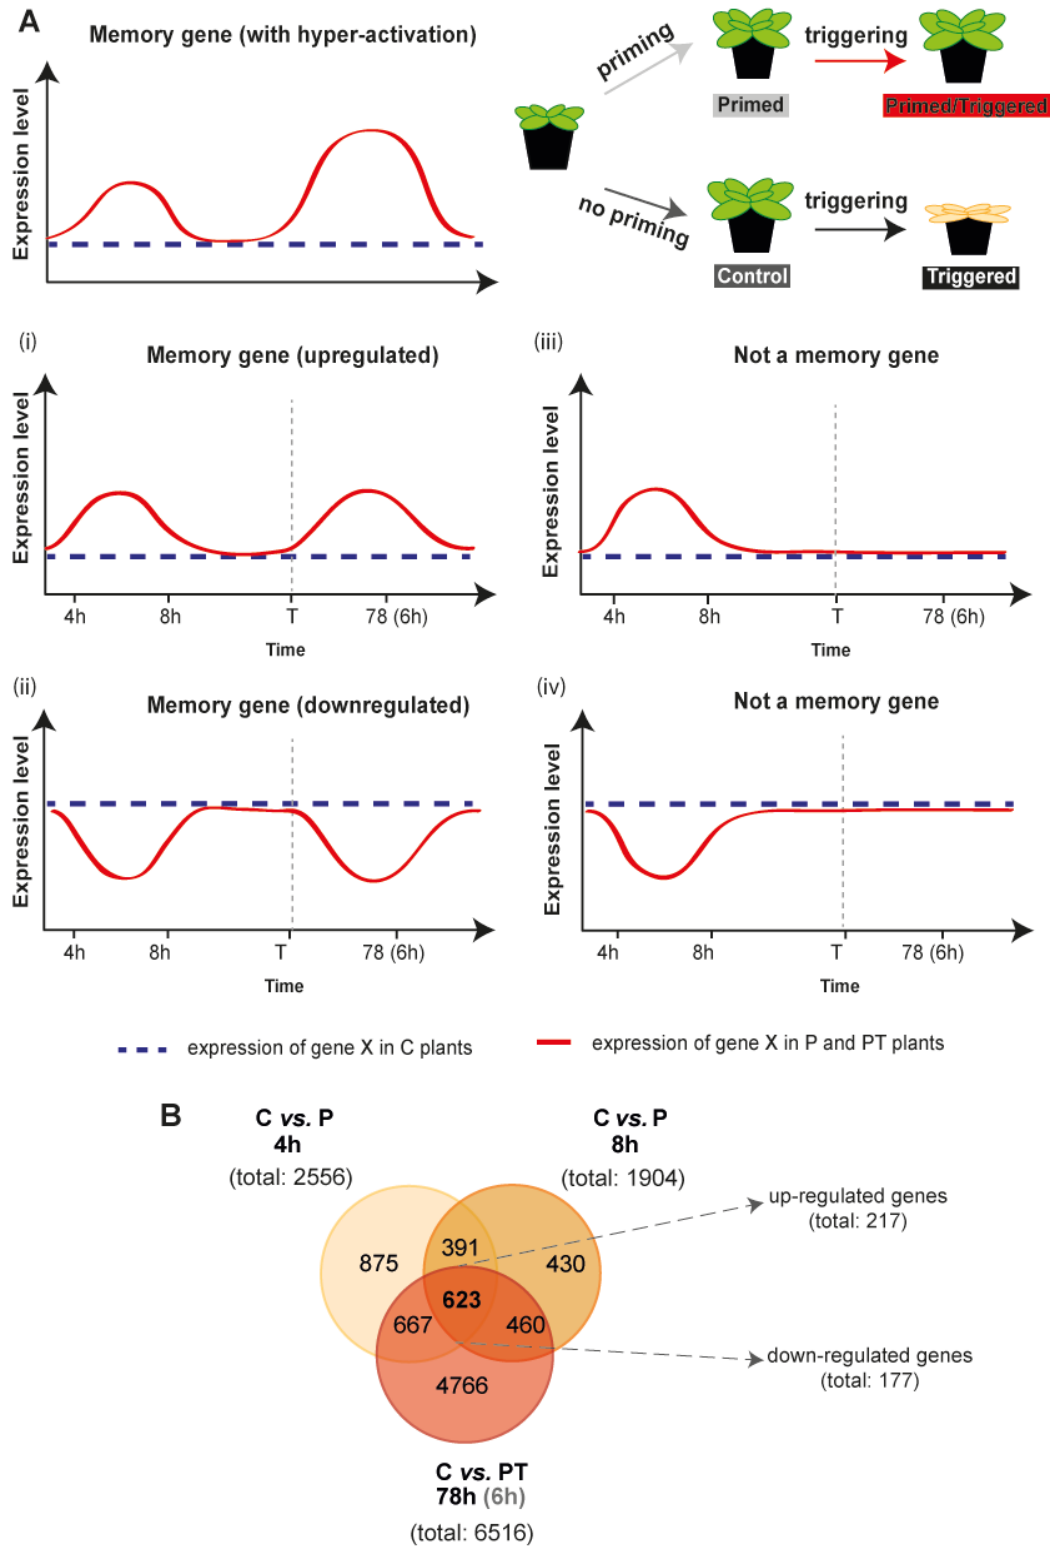

**Fig. S3.** Identification of thermomemory genes at the shoot apex. (A) Transcriptional memory genes were identified by RNA-seq as: (i) genes whose expression level was significantly upregulated at 4 and 8h after

priming and at 6h after triggering (72h after priming) compared to control (C) condition, and (ii) genes whose expression level was significantly downregulated at 4 and 8h after priming and at 6h after triggering (72h after priming) compared to C condition. Note, that genes whose expression was induced (iii) or downregulated (iv) only by the priming stimulus were not considered as memory genes. (B) Venn diagram of DEGs at 4h and 8h after priming and 6h after triggering (78h after priming) of primed (P) and primed and triggered (PT) plants compared to the control (C). The overlap represents significantly changed HS memory genes at the shoot apex of Col-0 plants during thermopriming.

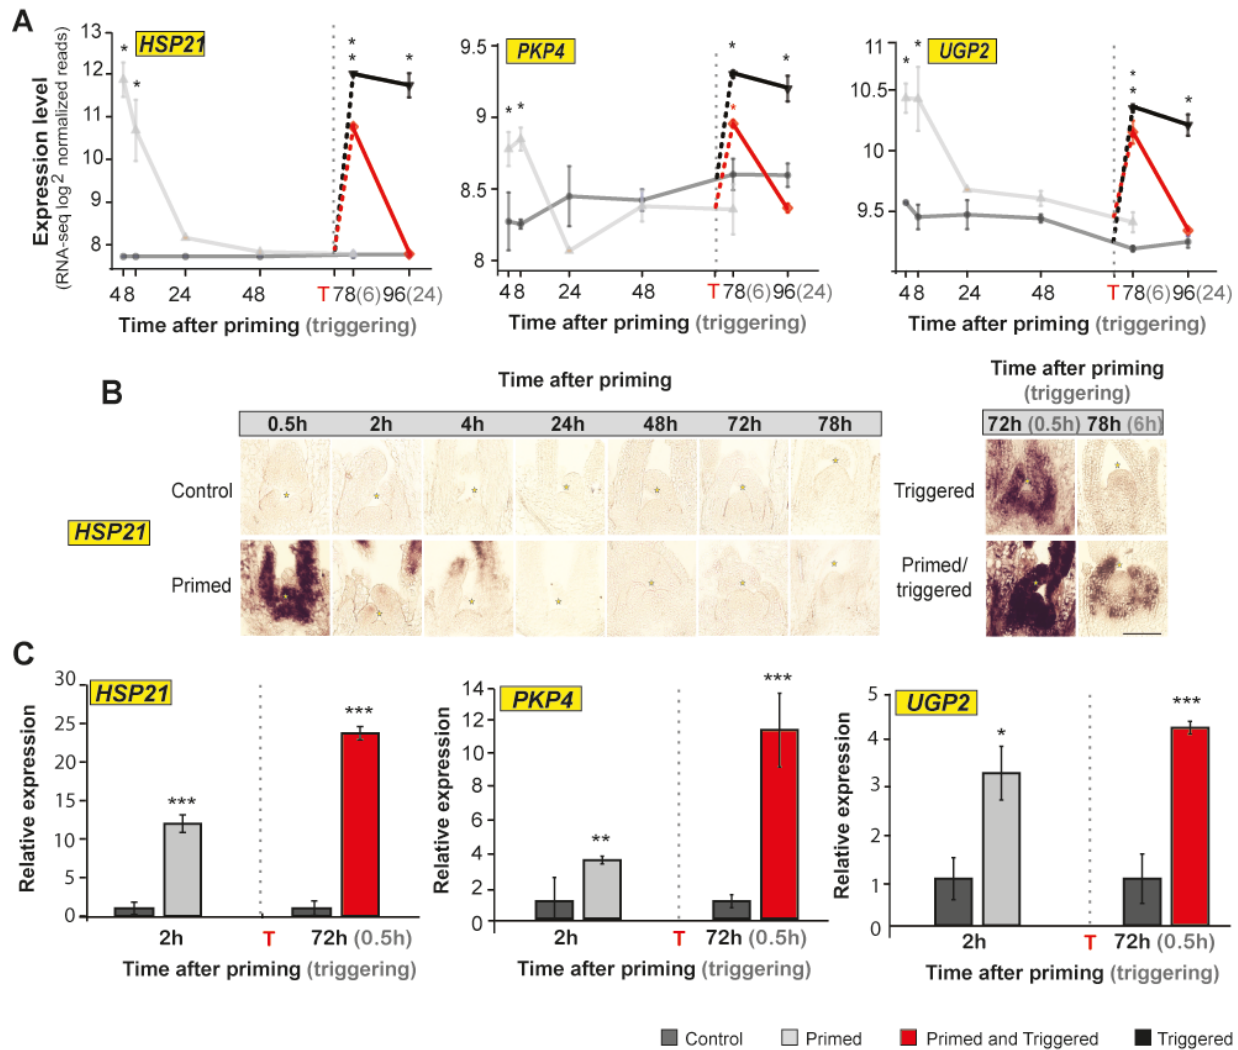

**Fig. S4.** Expression of HS memory-induced genes at the shoot apical meristem (SAM) of Col-0 wild-type plants. (A) Relative expression level of *HEAT SHOCK PROTEIN 21* (*HSP21*), *PYRUVATE KINASE 4* (*PKP4*) and *UDP-GLUCOSE PYROPHOSPHORYLASE 2* (*UGP2*) genes at the shoot apex of Col-0 plants obtained by RNA-seq ( $n=3$ ). (B) RNA-seq results by RNA *in situ* hybridization using *HSP21* as probe on longitudinal section through meristems of Col-0 plants. Scale bars, 100 $\mu$ m. (C) Expression level of *HSP21*, *PKP4* and *UGP2*, at the SAM of Col-0 plants during thermopriming obtained by qRT-PCR. Time is given in hours (h) after priming (black color) and triggering (grey color) treatments. The vertical dashed line represents the time point of triggering (T) treatment. Error bars indicate s.d. ( $n=3$ ). Asterisks indicate meristem summit (B) or statistically significant difference ((A)  $*P \leq 0.05$  adjusted with Benjamini-Hochberg procedure for multiple testing correction; (C) Student's t-test:  $*P \leq 0.05$ ;  $**P \leq 0.01$ ;  $***P \leq 0.001$ ) from the control conditions.

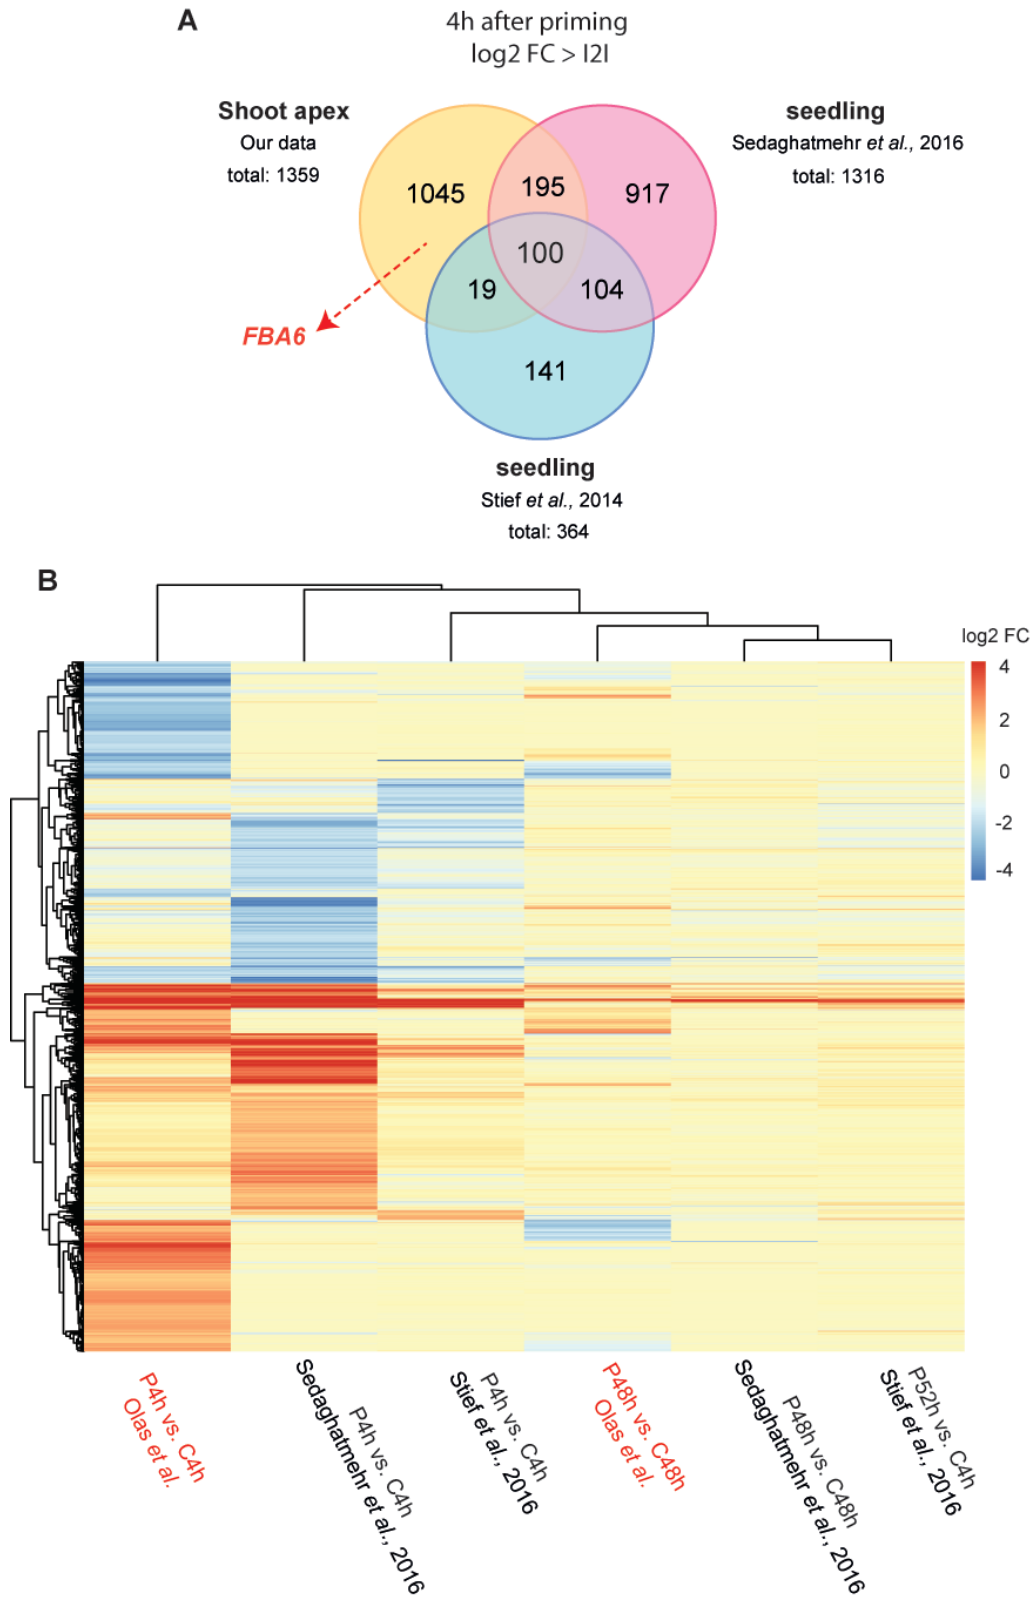

**Fig. S5.** Tissue-dependent variation in the regulation of thermomemory. (A) Venn diagram representation of fold change expression of genes identified at the shoot apex and in whole seedlings of Arabidopsis (Stief *et al.*, 2014; Sedaghatmehr *et al.*, 2016) at 4h after priming with  $\log_2 FC > |2|$ . Note, that priming treatment



was performed in the same way in all studies. (B) Heat map visualizing the responses of genes changed at 4h and 48/52h after priming (P) *versus* control (C);  $\log_2FC > |2|$ ; 2,521 genes) between shoot apex and whole seedlings of Arabidopsis (Stief *et al.*, 2014; Sedaghatmehr *et al.*, 2016) with  $\log_2FC > |2|$ . Note, data reported by Stief *et al.* (2014) and Sedaghatmehr *et al.* (2016) were obtained by microarray analyses. The published data was downloaded from NCBI GEO and processed to obtain  $\log_2FC$  values compared to control allowing comparison to the RNA-seq data.

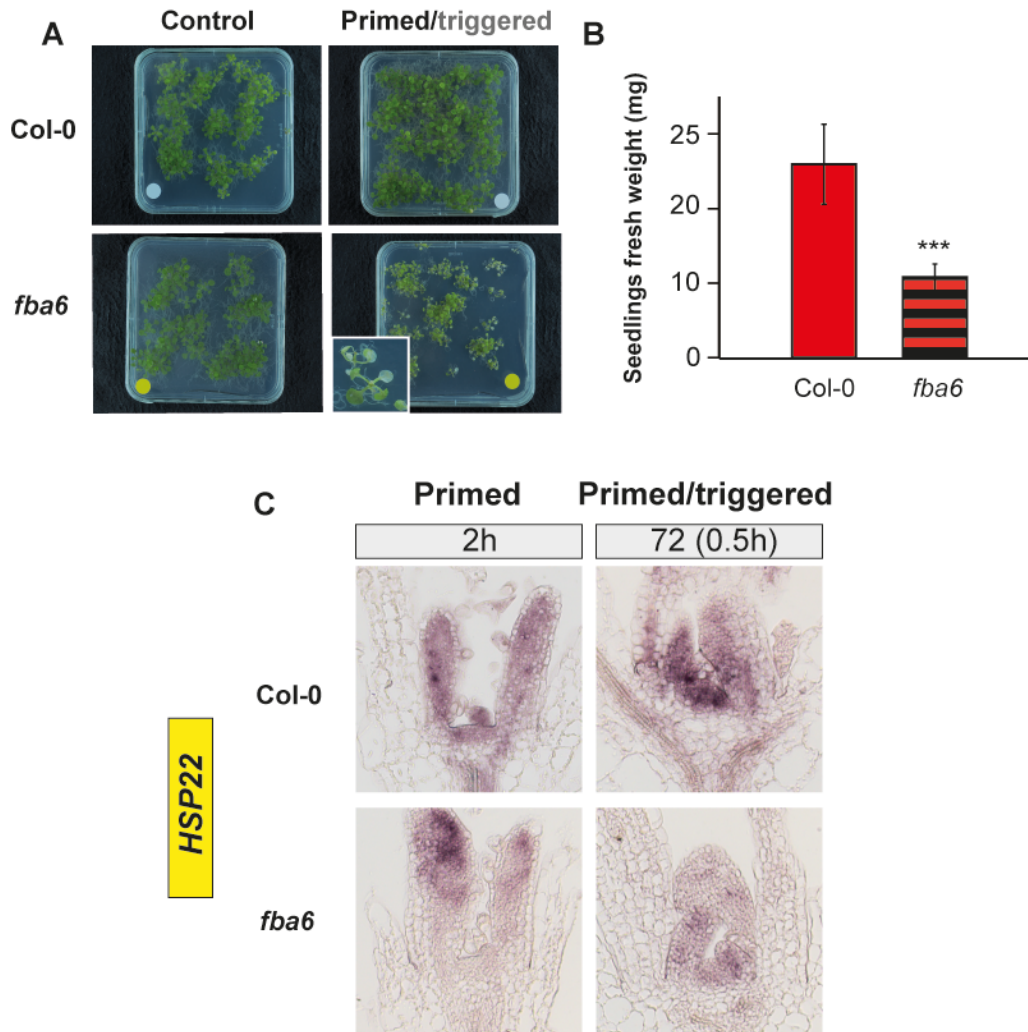

**Fig. S6.** Growth recovery of *fba6* and *fba8* mutants and Col-0 wild-type plants. (A) Phenotype of Col-0 and *fba6* seedlings 5 days after triggering. (B) Fresh weight of results shown in (A) for PT Col-0 and *fba6* plants. Error bars indicate s.d. ( $n > 12$ ). Asterisks indicate statistically significant difference (Student's *t*-test: \*\*\* $P \leq 0.001$ ) from Col-0. (C) RNA *in situ* hybridization on longitudinal sections through apices of primed and primed/triggered Col-0 wild-type and *fba6* mutant plants using a specific probe against *HEAT SHOCK PROTEIN 22* (HSP22).

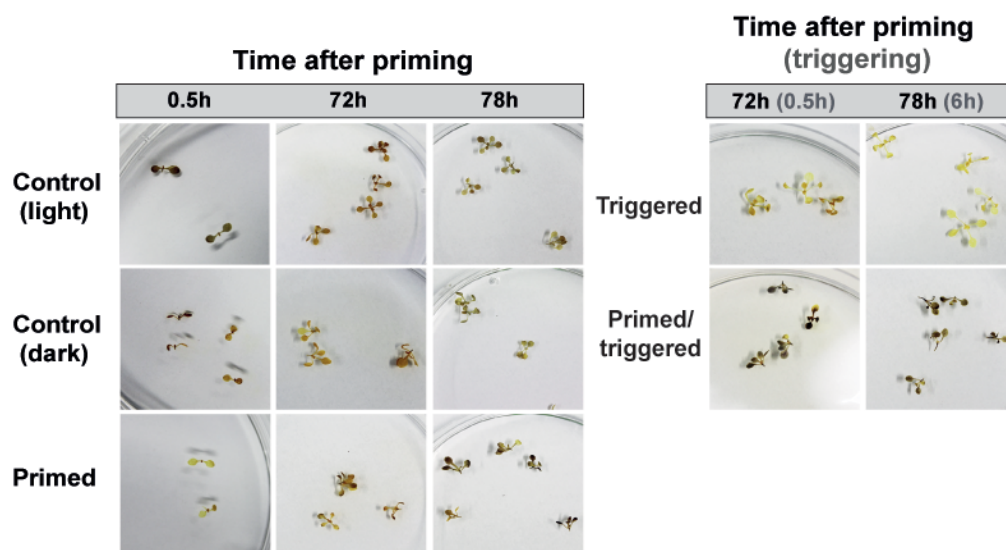

**Fig. S7.** Sugar availability. Iodine staining of Col-0 wild-type plants during thermopriming. Time is given in hours (h) after priming (black color) and triggering (grey color) treatments.

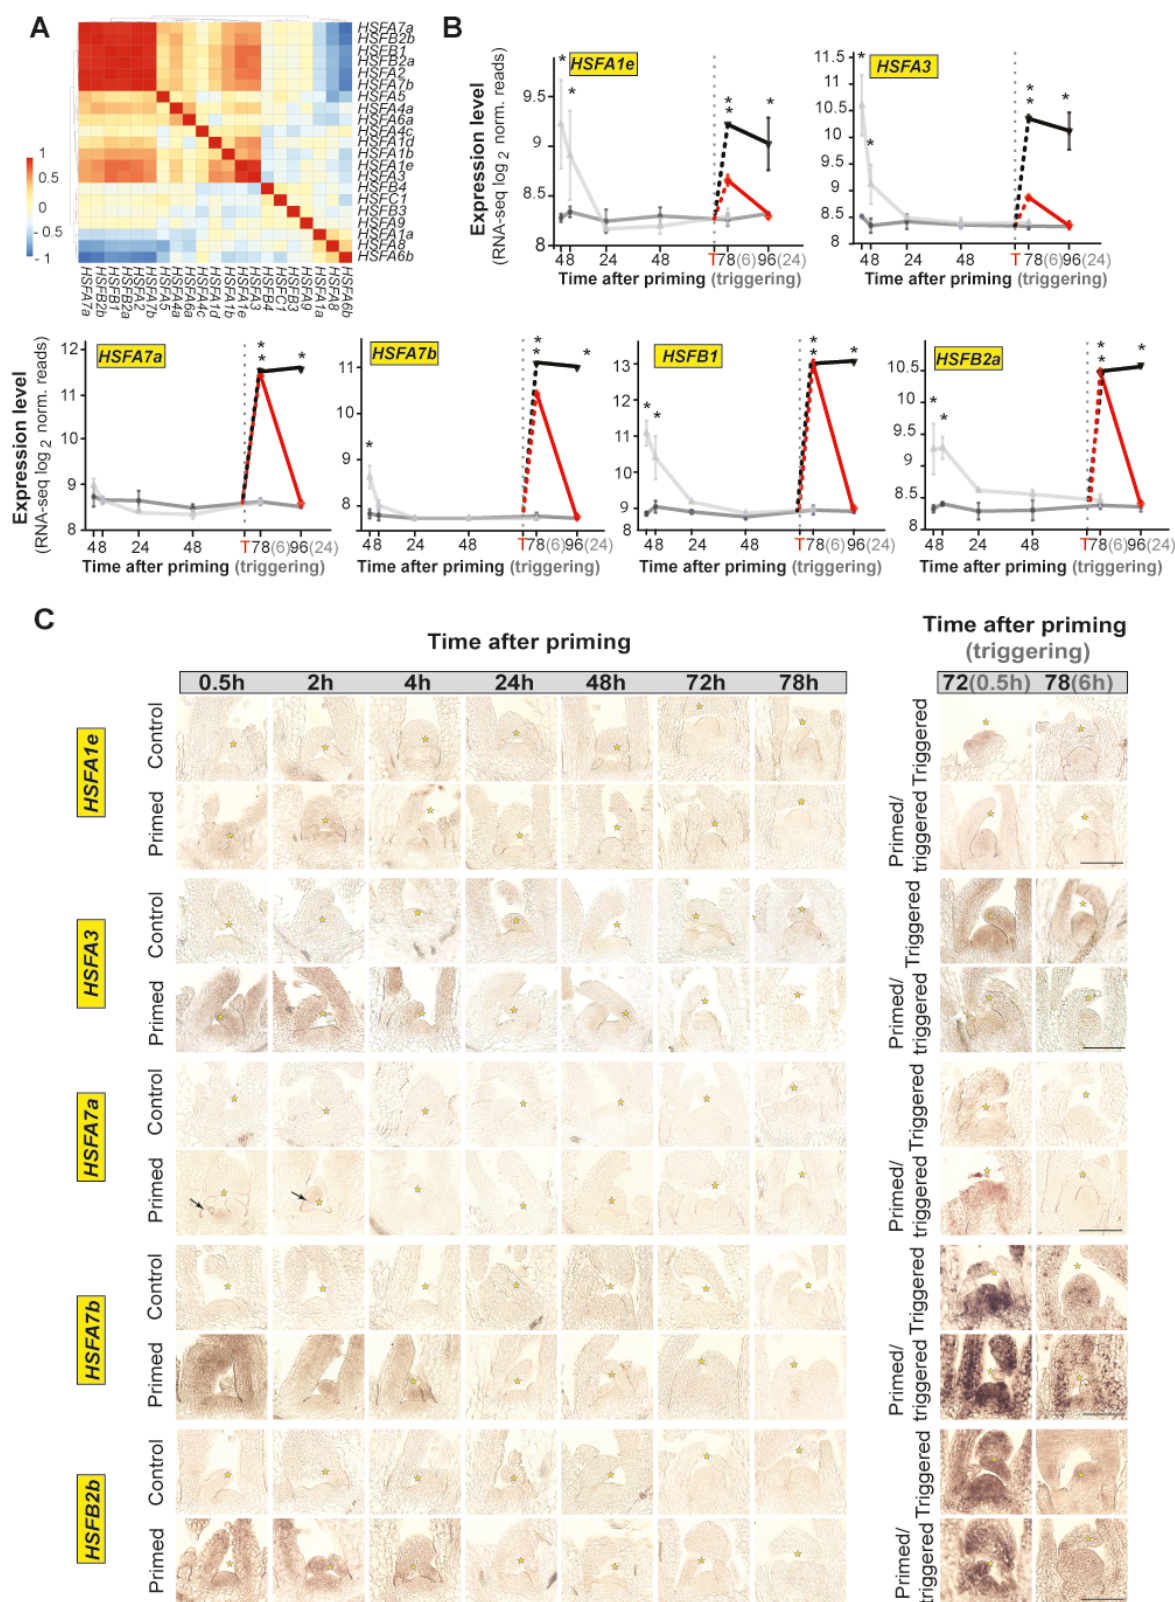

**Fig. S8.** *HSFs* expressed in the shoot apex. (A) Clustering of *HEAT SHOCK TRANSCRIPTION FACTORS* (*HSFs*) using correlation as distance measure. (B) Expression level of induced *HSFs* in the shoot apex

analyzed by RNA-seq. Error bars indicate s.d. ( $n=3$ ). Asterisks indicate statistically significant difference ( $*P<0.05$  adjusted with Benjamini-Hochberg procedure for multiple testing correction) from the control conditions. The vertical dashed line represents the time point of triggering (T) treatment. (C) RNA *in situ* hybridization on longitudinal sections through apices of control, primed, primed and triggered and triggered seedlings grown in LD condition using specific probes against *HSFs*. Asterisks indicate meristem summit. Scale bars, 100 $\mu$ m. Time is given in hours (h) after priming (black color) and triggering (grey color) treatment.

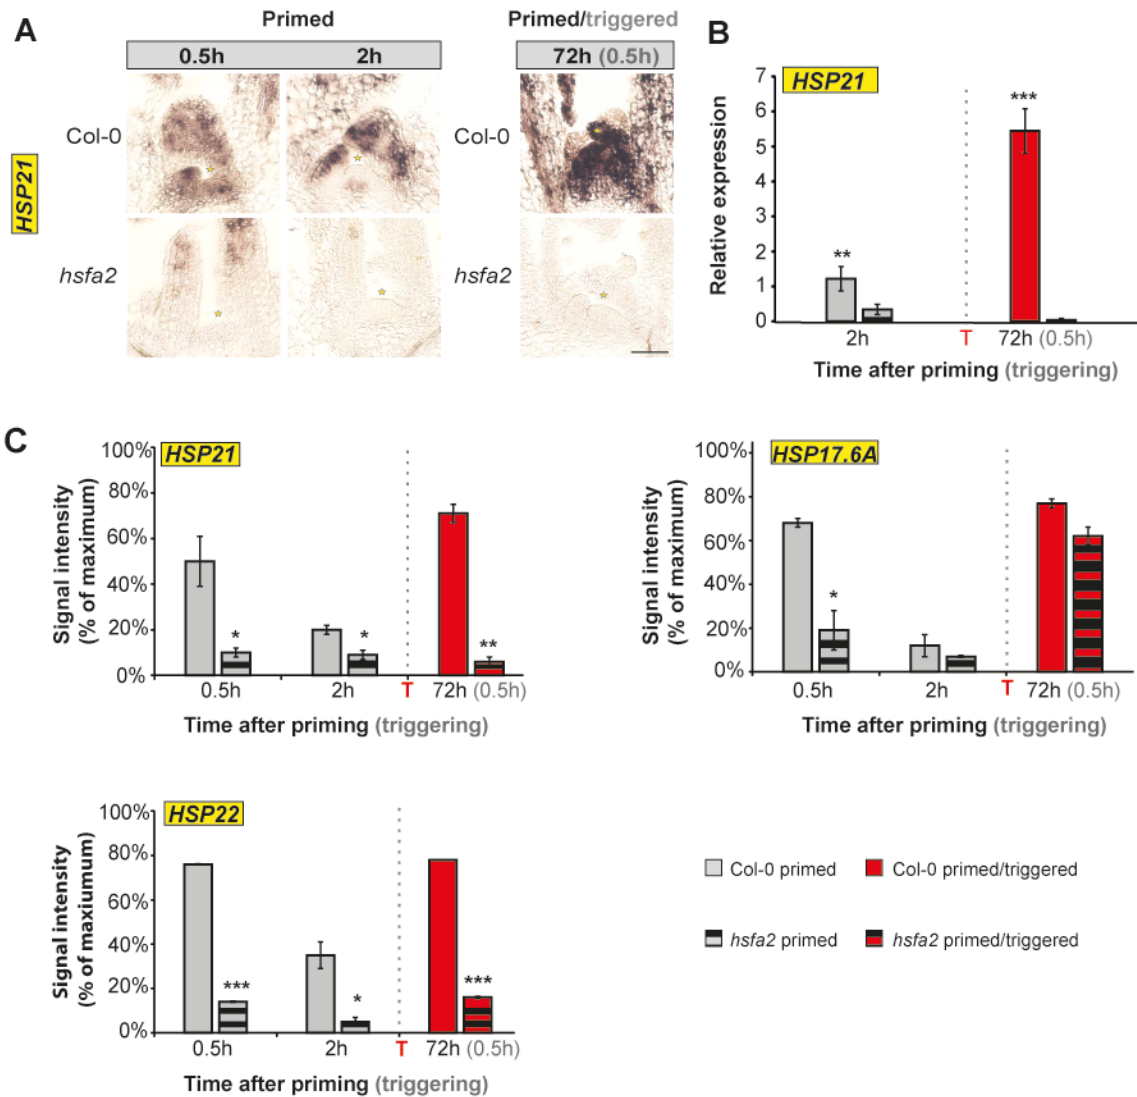

**Fig. S9.** Expression of *HSPs* at the SAM of Col-0 and *hsfa2* mutant plants. (A) RNA *in situ* hybridization on longitudinal sections through apices of Col-0 wild-type and *hsfa2* mutant plants using a specific probe against *HEAT SHOCK PROTEIN 21* (*HSP21*). Scale bars, 100 $\mu$ m. (B) Expression level of *HSP21* at the SAM of Col-0 wild-type and *hsfa2* mutants analyzed by qRT-PCR. (C) Signal intensity (% of maximum) of *HSP21*, *HSP17.6A* and *HSP22* measured at the SAM of Col-0 and *hsfa2* mutant plants. Error bars indicate s.d. ( $n=3$ ). Asterisks indicate meristem summit (A) or statistically significant difference (Student's *t*-test: \* $P\leq 0.05$ ; \*\* $P\leq 0.01$ ; \*\*\* $P\leq 0.001$ ; (B, C)) from control conditions. Time is given in hours (h) after priming (black color) and triggering (grey color) treatment. The vertical dashed line represents the time point of the triggering (T) treatment.

**Table S1.** Flowering time data described in this study.

| <b>Treatment (Col-0; long days)</b> | <b>DTB</b>                    | TLN                     | LIR                      | n    |
|-------------------------------------|-------------------------------|-------------------------|--------------------------|------|
| Control                             | <b>19.3 ± 0.5</b>             | 10.7 ± 1.0              | 0.54 ± 0.06              | 13   |
| Primed                              | <b>21.4 ± 1.6<sup>+</sup></b> | 9.1 ± 0.6 <sup>+</sup>  | 0.43 ± 0.05 <sup>+</sup> | 16   |
| Primed/triggered                    | <b>24.1 ± 2.2<sup>+</sup></b> | 11.7 ± 1.3 <sup>+</sup> | 0.49 ± 0.1 <sup>+</sup>  | 15   |
| Triggered                           | n.a.                          | n.a.                    | n.a.                     | n.a. |

Data represent averages of at least 20 genetically identical replicate plants. Abbreviations: DTB, days to bolting, in bold as referred to in the main text; TLN, total leaf number; LIR, leaf initiation rate; n, number of individuals; (+/-), presence or absence of significance based on Student's *t*-test calculated between control and treated plants, respectively (<sup>+</sup>: *P*-value ≤ 0.05, <sup>-</sup>: *P*-value ≥ 0.05); n.a., not analysed.

**Table S2.** Number of significantly changed genes with and without  $\log_2 FC > |1|$ . Number of upregulated and downregulated genes is indicated in brackets.

|                                                              | 4h               | 8h             | 48h            | 78h              | 96h              |
|--------------------------------------------------------------|------------------|----------------|----------------|------------------|------------------|
| <b>DEGs: significant</b>                                     |                  |                |                |                  |                  |
| <b>C versus P</b>                                            | 2556 (1259;1297) | 1904 (968;936) | 1241 (549;692) | 51 (8;43)        | -                |
| <b>C versus PT</b>                                           |                  |                |                | 6516 (3658;2858) | 120 (40;80)      |
| <b>C versus T</b>                                            |                  |                |                | 6108 (3574;2534) | 3298 (2046;1252) |
| <b>PT versus T</b>                                           |                  |                |                | 2496 (1334;1162) | 6439 (3706;2733) |
| <b>DEGs: significant and <math>\log_2 FC &gt;  1 </math></b> |                  |                |                |                  |                  |
| <b>C versus P</b>                                            | 1175 (664;511)   | 780 (404, 376) | 203 (106;97)   | 0 (0;0)          | -                |
| <b>C versus PT</b>                                           |                  |                |                | 2105 (1050;1055) | 1 (0;1)          |
| <b>C versus T</b>                                            |                  |                |                | 2054 (1202;852)  | 1634 (1053;581)  |
| <b>PT versus T</b>                                           |                  |                |                | 631 (441;190)    | 2219 (1300;916)  |

Abbreviations: C, control; P, primed; PT, primed and triggered; T, triggered.



**Table S3.** Analysis of 5' upstream regulatory regions of identified memory genes.

|                                             | <b>Number</b> | <b>Basic HSE<br/>(5'-nGAAnnTTCn-3')</b> | <b>Perfect HSE<br/>(5'-nGAAnnTTCnnGAAn-3')</b> |
|---------------------------------------------|---------------|-----------------------------------------|------------------------------------------------|
| All genes                                   | 33,602        | 11,000 (32,7%)                          | 300 (0.89%)                                    |
| <b>Memory genes</b>                         | 182           | 78 (42,8%)                              | 10 (5.49%)                                     |
| <b>Hypergeometric test (<i>P</i>-value)</b> | -             | 0,001                                   | 5.3*e-06                                       |

Sequences of heat stress elements (HSEs) based on Nover *et al.* (2001) were identified in 5' upstream regions of memory genes (up to 1,000 bp from the ATG start codon). Significant difference was calculated using hypergeometric test (*P*-value).

**Table S4.** List of memory genes containing HSE in 5' upstream regulatory regions.

| ATG Identifier | Symbol                    | Basic HSE | Perfect HSE |
|----------------|---------------------------|-----------|-------------|
| AT1G03070      | LFG4                      | +         |             |
| AT1G04130      | TPR2                      | +         |             |
| AT1G21550      | AT1G21550                 | +         |             |
| AT1G26800      | MPSR1                     | +         |             |
| AT1G30070      | AT1G30070                 | +         |             |
| AT1G48710      | Transposable element gene | +         |             |
| AT1G52560      | AT1G52560                 | +         |             |
| AT1G52870      | AT1G52870                 | +         |             |
| AT1G53540      | AT1G53540                 | +         | +           |
| AT1G54050      | AT1G54050                 | +         |             |
| AT1G66510      | AT1G66510                 | +         |             |
| AT1G67360      | SRP1                      | +         |             |
| AT1G71000      | AT1G71000                 | +         | +           |
| AT1G72610      | GER1                      | +         |             |
| AT1G73480      | MAGL4                     | +         |             |
| AT1G74310      | HSP101                    | +         |             |
| AT1G79920      | HSP70-15                  | +         |             |
| AT2G13550      | AT2G13550                 | +         |             |
| AT2G20560      | AT2G20560                 | +         |             |
| AT2G21820      | AT2G21820                 | +         |             |
| AT2G26150      | HSFA2                     | +         | +           |
| AT2G29500      | AT2G29500                 | +         |             |
| AT2G32120      | HSP70T-2                  | +         |             |
| AT2G32860      | BGLU33                    | +         |             |
| AT2G36460      | FBA6                      | +         |             |
| AT2G46240      | BAG6                      | +         |             |
| AT2G47180      | GOLS1                     | +         |             |
| AT3G02990      | HSFA1E                    | +         |             |
| AT3G03270      | HRU1                      | +         |             |
| AT3G04720      | PR4                       | +         |             |
| AT3G07150      | AT3G07150                 | +         |             |
| AT3G08690      | UBC11                     | +         |             |
| AT3G08770      | LTP6                      | +         |             |
| AT3G08970      | TMS1                      | +         |             |
| AT3G09350      | FES1A                     | +         |             |
| AT3G09640      | APX2                      | +         |             |
| AT3G10020      | AT3G10020                 | +         |             |
| AT3G12145      | FLOR1                     | +         |             |
| AT3G12580      | HSP70                     | +         | +           |
| AT3G15770      | AT3G15770                 | +         |             |
| AT3G16530      | AT3G16530                 | +         |             |
| AT3G22840      | ELIP1                     | +         | +           |
| AT3G24100      | AT3G24100                 | +         |             |
| AT3G24500      | MBF1C                     | +         |             |
| AT3G46230      | HSP17.4                   | +         | +           |
| AT3G63310      | LFG2                      | +         |             |
| AT4G04020      | FIB1A                     | +         |             |
| AT4G10040      | CYTC-2                    | +         |             |
| AT4G17250      | AT4G17250                 | +         |             |
| AT4G21323      | AT4G21323                 | +         |             |
| AT4G23493      | AT4G23493                 | +         |             |
| AT4G23680      | AT4G23680                 | +         |             |
| AT4G25200      | ATHSP23.6-MITO            | +         |             |
| AT4G25810      | XTR6                      | +         |             |
| AT4G27670      | HSP21                     | +         |             |
| AT5G03340      | ATCDC48C                  | +         |             |
| AT5G05410      | DREB2A                    | +         |             |
| AT5G12020      | HSP17.6II                 | +         |             |
| AT5G13200      | GER5                      | +         |             |
| AT5G17310      | UGP2                      | +         |             |
| AT5G25450      | AT5G25450                 | +         |             |
| AT5G50240      | PIMT2                     | +         |             |
| AT5G51440      | AT5G51440                 | +         |             |
| AT5G51740      | OMA1                      | +         |             |
| AT5G52640      | HSP90.1                   | +         | +           |
| AT5G58770      | CPT7                      | +         |             |
| AT5G59720      | HSP18.2                   | +         | +           |
| AT5G59820      | ZAT12                     | +         | +           |
| AT5G62020      | HSFB2A                    | +         | +           |
| AT5G64170      | LNK1                      | +         |             |
| AT5G64510      | TIN1                      | +         |             |
| ATMG00160      | COX2                      | +         |             |
| ATMG00516      | NAD1C                     | +         |             |
| ATMG00670      | ORF275                    | +         |             |
| ATMG01120      | NAD1B                     | +         |             |
| ATMG01130      | ORF106F                   | +         |             |
| ATMG01360      | COX1                      | +         |             |

**Table S5. Oligonucleotides used in this study.**

| Gene (AGI)                               | Oligo             | Sequence (5'→3')            |
|------------------------------------------|-------------------|-----------------------------|
| <b>Oligonucleotides used for cloning</b> |                   |                             |
| <i>CLV1</i>                              | <i>CLV1_F</i>     | ATGGCGATGAGACTTTTGAAGAC     |
| AT1G75820                                | <i>CLV1_R</i>     | TCAGAACCGCATCAAGTTCGCCAC    |
| <i>CLV3</i>                              | <i>CLV3_F</i>     | ATGGATTCTGAAGAGTTTCTGCTGC   |
| AT2G27250                                | <i>CLV3_R</i>     | TCAAGGGAGCTGAAAGTTGTTC      |
| <i>FBA1</i>                              | <i>FBA1_F</i>     | ATGGCGTCAA GCACTGCGAC       |
| AT2G36460                                | <i>FBA1_R</i>     | TTAGTAGGTGTAGCCTTTTAC       |
| <i>FBA2</i>                              | <i>FBA2_F</i>     | ATGGCATCAACCTCACTCCTC       |
| AT2G36460                                | <i>FBA2_R</i>     | TCAATAGGTGTACCCTTGGACGAAC   |
| <i>FBA3</i>                              | <i>FBA3_F</i>     | ATGGCGTCTG CTAGCTTCGTTAAGC  |
| AT2G36460                                | <i>FBA3_R</i>     | TCAGTAGGTGAACCCCTTG         |
| <i>FBA6</i>                              | <i>FBA6_F</i>     | ATGTCTTCCTTCACTCCAAATTC     |
| AT2G36460                                | <i>FBA6_R</i>     | TCAGTACTTGTAATCCTTAAACG     |
| <i>FBA8</i>                              | <i>FBA8_F</i>     | ATGTCTGCCTTCAACAAGC         |
| AT2G36460                                | <i>FBA8_R</i>     | TCAGTACTTGTAATCCTTCAACG     |
| <i>HSFA1a</i>                            | <i>HSFA1a_F</i>   | ATGTTTGTAAATTTCAAATAC       |
| AT4G17750                                | <i>HSFA1a_R</i>   | CTAGTGTCTGTTTCTGATG         |
| <i>HSFA1b</i>                            | <i>HSFA1b_F</i>   | ATGGAATCGGTTCCCGAATCC       |
| AT5G16820                                | <i>HSFA1b_R</i>   | TTATTTCTCTGTGCTTCGAGG       |
| <i>HSFA1d</i>                            | <i>HSFA1d_F</i>   | ATGGATGTAGCAAAGTAACC        |
| AT1G32330                                | <i>HSFA1d_R</i>   | TCAAGGATTTGCTTCGAGAG        |
| <i>HSFA1e</i>                            | <i>HSFA1e_F</i>   | ATGGGAACGGTTTGCGAATC        |
| AT3G02990                                | <i>HSFA1e_R</i>   | TCATTTTCTGAGAGCATCTG        |
| <i>HSFA2</i>                             | <i>HSFA2_F</i>    | ATGGGAAGAACTGAAAGTGGAAATG   |
| AT2G26150                                | <i>HSFA2_R</i>    | TTAAGGTTCCGAACCAACAAAACC    |
| <i>HSFA3</i>                             | <i>HSFA3_F</i>    | ATGAGCCCAAAAAAAGATGC        |
| AT5G03720                                | <i>HSFA3_R</i>    | CTAAGGATCATTCATTGGC         |
| <i>HSFA7a</i>                            | <i>HSFA7a_F</i>   | ATGATGAACCCGTTTCTCCC        |
| AT3G51910                                | <i>HSFA7a_R</i>   | TTAGGAGGTGGAAGCCAAATC       |
| <i>HSFA7b</i>                            | <i>HSFA7b_F</i>   | ATGGACCCGTCGTCAAGCTCC       |
| AT3G63350                                | <i>HSFA7b_R</i>   | CTAATCTTGCTTCACATTCCG       |
| <i>HSFB2b</i>                            | <i>HSFB2b_F</i>   | ATGCCGGGGGAACAACCCGG        |
| AT4G11660                                | <i>HSFB2b_R</i>   | TCATTTTCCGAGTTCAAAGCC       |
| <i>HSP17.6A</i>                          | <i>HSP17.6A_F</i> | ATGGATTGGAGTTTGGGAAGG       |
| AT5G12030                                | <i>HSP17.6A_R</i> | TCAAGCGACTTGAACCTGTATAG     |
| <i>HSP21</i>                             | <i>HSP21_F</i>    | ATGGCTTCTACTCTCATTTCG       |
| AT4G27670                                | <i>HSP21_R</i>    | CTACTGAACTGGACATCGATG       |
| <i>HSP22</i>                             | <i>HSP22_F</i>    | ATGATGAAGCACTTGCTAAGCATC    |
| AT4G10250                                | <i>HSP22_R</i>    | TCAGAGTTCTTTGGATTCAGAAG     |
| <i>LFY</i>                               | <i>LFY_F</i>      | ATGGATCCTGAAGGTTTTCACG      |
| AT5G61850                                | <i>LFY_R</i>      | CTAGAAACGCAAGTCGTCGCCG      |
| <b>Oligonucleotides used for qRT-PCR</b> |                   |                             |
| <i>TUB2</i>                              | <i>TUB_F</i>      | GAGCCTTACAACGCTACTCTGTCTGTC |
| AT5G62690                                | <i>TUB_R</i>      | ACACCAGACATAGTAGCAGAAATCAAG |
| <i>CLV1</i>                              | <i>CLV1_F</i>     | TCGGATGCTGCTATTGTTGTTGCG    |
| AT1G75820                                | <i>CLV1_R</i>     | TTCGCCACGGATTTAGGAGGGTTA    |
| <i>CLV3</i>                              | <i>CLV3_F</i>     | AGGACTTCCAACCGCAAGA         |
| AT2G27250                                | <i>CLV3_R</i>     | TCACATGATGGTGCAACGG         |
| <i>FBA6</i>                              | <i>FBA6_F</i>     | GGCGAGTCTCAAAAACCGGAGA      |
| AT2G36460                                | <i>FBA6_R</i>     | TCGTCTGTGAGCCAACAAGTTC      |
| <i>FBA8</i>                              | <i>FBA8_F</i>     | CAAGCAAATTCGCGGATGA         |
| AT2G36460                                | <i>FBA8_R</i>     | CTCGCAAGACGCTTCCAAT         |
| <i>HSFA2</i>                             | <i>HSFA2_F</i>    | GCAGCGTTGGATGTGAAAGTGG      |
| AT2G26150                                | <i>HSFA2_R</i>    | TTGGCTGTCCAATCCAAAGGC       |
| <i>HSP17.6A</i>                          | <i>HSP17.6A_F</i> | ACCAGCTGACGTTATCGAGCA       |
| AT5G12030                                | <i>HSP17.6A_R</i> | CACCACAAGCAGCTTCTCGTT       |
| <i>HSP21</i>                             | <i>HSP21_F</i>    | GGACGCTCTCCTTTCGGATTG       |
| AT4G27670                                | <i>HSP21_R</i>    | GCATCGTCTCATTTGGTGACA       |
| <i>HSP22</i>                             | <i>HSP22_F</i>    | CGGTTCCCTGATCCATTCAA        |
| AT4G10250                                | <i>HSP22_R</i>    | GCCCTTCTGCTGTTTCTTCC        |
| <i>PFK3</i>                              | <i>PFK3_F</i>     | GGCTCAACGAGCTATTAATGCA      |
|                                          |                   | ATCGCTATGAACCCGCTGTAG       |

|                                             |                      |                                   |
|---------------------------------------------|----------------------|-----------------------------------|
| AT4G26270                                   | <i>PFK3_R</i>        |                                   |
| <b><i>PKP4</i></b>                          | <i>PKP4_F</i>        | CCGGTGATTATGGCAACTCA              |
| AT3G49160                                   | <i>PKP4_R</i>        | ACAGCTCGCCCTTTTGGCA               |
| <b><i>UGP2</i></b>                          | <i>UGP2_F</i>        | CGTCTCTGAAGATGCTTCCGA             |
| AT5G17310                                   | <i>UGP2_R</i>        | CCGATTTTGGACCAGTGCA               |
| <b>Oligonucleotides used for genotyping</b> |                      |                                   |
| <b><i>FBA6</i></b>                          | <i>FBA6_LP_wt</i>    | TAACGCTGCTTACATCGGAAC             |
| AT2G36460                                   | <i>FBA6_RP_wt</i>    | CGATCCTCAGCCTCTTTCTTC             |
| <b><i>fb</i>6 T-DNA</b>                     | <i>FBA6_RP_wt</i>    | CGATCCTCAGCCTCTTTCTTC             |
|                                             | <i>fb</i> 6_LB_T-DNA | TAGCATCTGAATTCATAACCAATCTCGATACAC |
| <b><i>FBA8</i></b>                          | <i>FBA8_LP_wt</i>    | CGTGAACCTAGCTTGGTTTCG             |
|                                             | <i>FBA8_RP_wt</i>    | CATTCTCCTTTACCTGCC                |
| <b><i>fb</i>8 T-DNA</b>                     | <i>FBA8_RP_wt</i>    | CATTCTCCTTTACCTGCC                |
|                                             | <i>Fba8_LB_T-DNA</i> | ATTTTGGCGATTTCGGAAC               |

---
